# Supplementary material for: Decoding the Gene Variants of Two Native Probiotic Lactiplantibacillus plantarum Strains through Whole-Genome Resequencing: Insights into Bacterial Adaptability to Stressors and Antimicrobial Strength
Source: MDPI journal article supplement (doi:10.3390/genes13030443), 2022-02-28
Supplement: s1 [file s1]

**Table S2.** Base change count for every SNP of UTNGt21A (A) and UTNGt2 (B).

| Library name |     | UTNGt21A | UTNGt2 |
|--------------|-----|----------|--------|
| Ref          | Alt |          |        |
| A            | T   | 388      | 237    |
|              | G   | 4331     | 3520   |
|              | C   | 749      | 614    |
| C            | A   | 769      | 663    |
|              | T   | 4266     | 3472   |
|              | G   | 337      | 241    |
| G            | A   | 4396     | 3472   |
|              | T   | 801      | 593    |
|              | C   | 290      | 247    |
| T            | A   | 423      | 323    |
|              | G   | 775      | 598    |
|              | C   | 4381     | 3594   |

Legend.

Alt: DNA sequence of the sample

Ref: reference sequences regarding specific position
