# Supplementary material for: Decoding the Gene Variants of Two Native Probiotic Lactiplantibacillus plantarum Strains through Whole-Genome Resequencing: Insights into Bacterial Adaptability to Stressors and Antimicrobial Strength
Source: MDPI journal article supplement (doi:10.3390/genes13030443), 2022-02-28

**Figure S2.** Distribution and type of IS elements annotated with EggNOG and ISsaga web tool. Inside ring depicted the IS elements predicted along the UTNGt21A genome; outside ring displayed the IS elements predicted in the UTNGt2 genome.

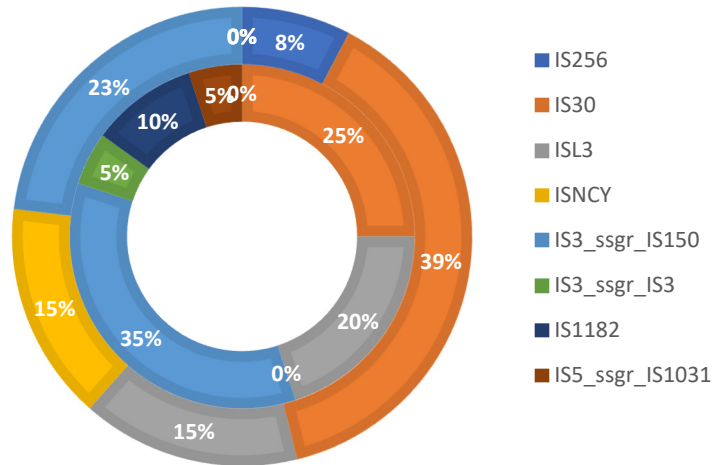

Supplement: s1 [file s1]
