# Supplementary material for: Decoding the Gene Variants of Two Native Probiotic Lactiplantibacillus plantarum Strains through Whole-Genome Resequencing: Insights into Bacterial Adaptability to Stressors and Antimicrobial Strength
Source: MDPI journal article supplement (doi:10.3390/genes13030443), 2022-02-28

**Figure S3.** A). Protein sequence pairwise alignment of putative bacteriocin from UTNGT21A and enterolysin\_A from UTNGt21O and *Enterococcus faecalis* (NCBI accession no. AGG79281.1) with Clustal WS (v.2.0) retrieved from Jalview. \*: indicate the similar amino acids. B). Average distance calculated based on percentage of similarity between sequences. The number on branch is the bootstrap value that indicates the extent of relatedness between two subjects.

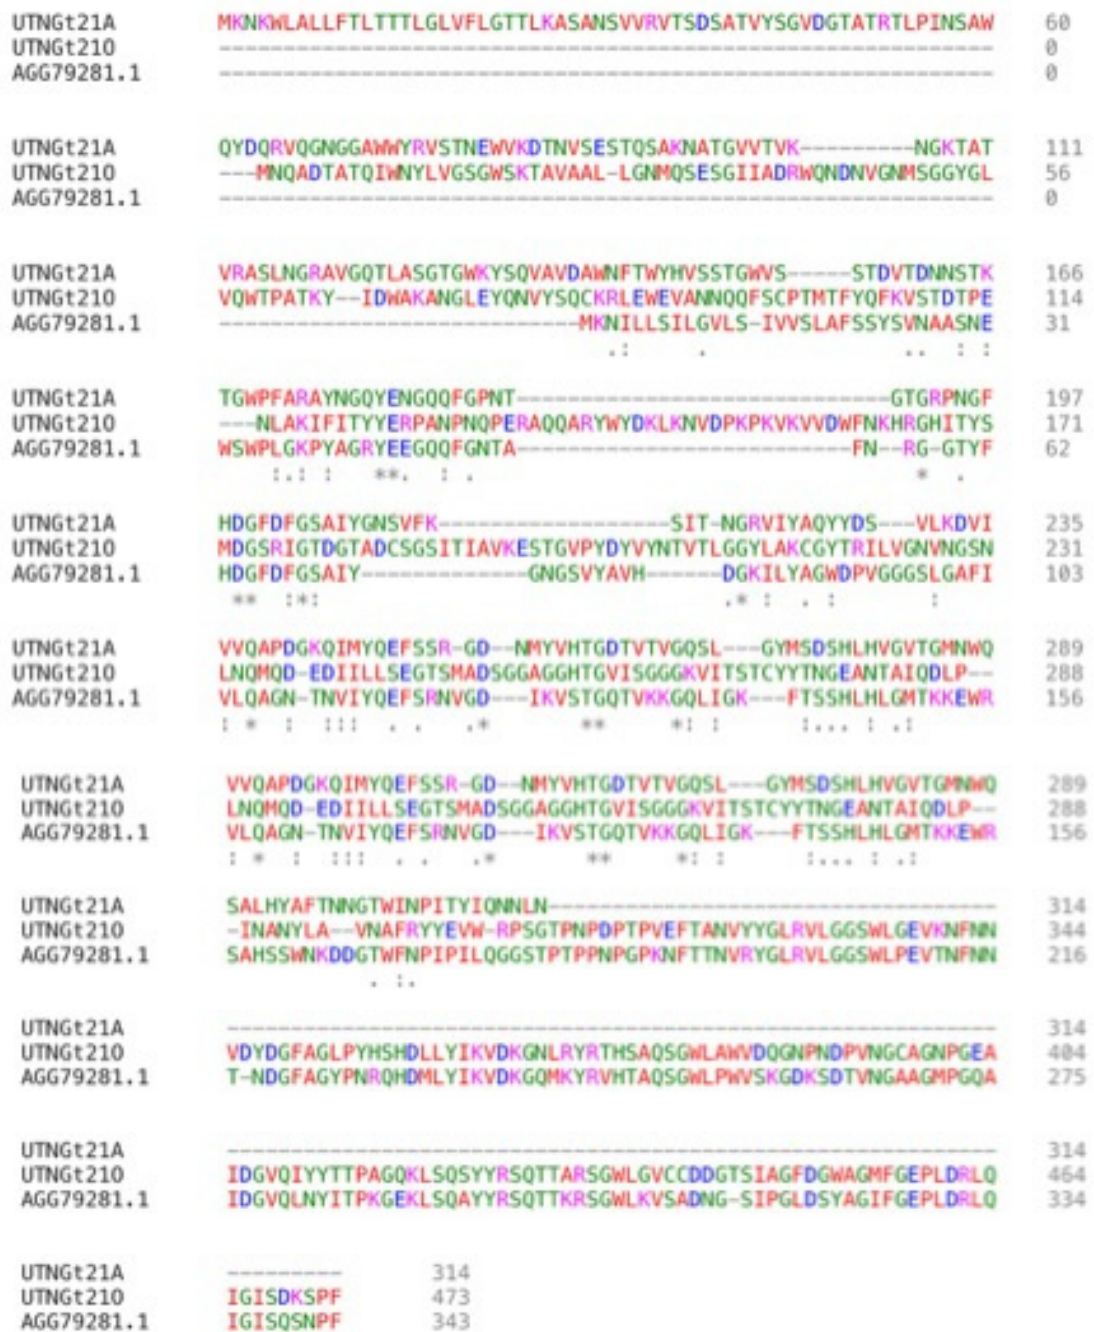

A.

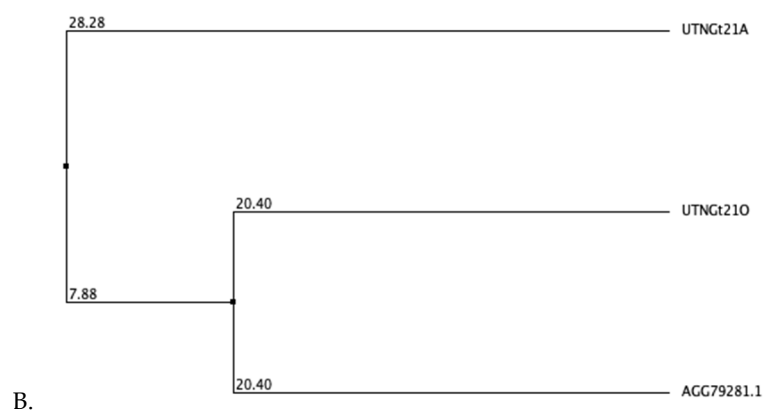

Supplement: s1 [file s1]
