# Supplementary material for: Decoding the Gene Variants of Two Native Probiotic Lactiplantibacillus plantarum Strains through Whole-Genome Resequencing: Insights into Bacterial Adaptability to Stressors and Antimicrobial Strength
Source: Genes (Basel). 2022 Feb 28;13(3):443. doi: 10.3390/genes13030443 (PMC8953754; doi:10.3390/genes13030443)
Supplement: Supplementary file 1 [file genes-13-00443-s001.zip › Table S1.xlsx]

## Sheet: A
Table S1. GIs detected within UTNGt21A (A) and UTNGt2 (B) genomes
Island start	Island end	Length	Method	Gene ID	Locus	Gene start	Gene end	Strand	Product
322590	329441	6851	IslandPath-DIMOB		Gt21A_00305	322590	322763	1	hypothetical protein
322590	329441	6851	IslandPath-DIMOB		Gt21A_00306	322931	323155	1	hypothetical protein
322590	329441	6851	IslandPath-DIMOB		Gt21A_00307	323180	323332	-1	hypothetical protein
322590	329441	6851	IslandPath-DIMOB		Gt21A_00308	323357	324025	-1	hypothetical protein
322590	329441	6851	IslandPath-DIMOB		Gt21A_00309	324135	324350	-1	hypothetical protein
322590	329441	6851	IslandPath-DIMOB		Gt21A_00310	325217	325417	1	hypothetical protein
322590	329441	6851	IslandPath-DIMOB		Gt21A_00311	325545	325712	1	hypothetical protein
322590	329441	6851	IslandPath-DIMOB		Gt21A_00312	325830	327029	1	SPBc2 prophage-derived glycosyltransferase SunS
322590	329441	6851	IslandPath-DIMOB		Gt21A_00313	327060	327806	1	hypothetical protein
322590	329441	6851	IslandPath-DIMOB		Gt21A_00314	327938	328087	1	hypothetical protein
322590	329441	6851	IslandPath-DIMOB	citA	Gt21A_00315	328101	329441	1	Sensor histidine kinase CitA
531384	572982	41598	IslandPath-DIMOB	rplJ	Gt21A_01147	531384	531887	1	50S ribosomal protein L10
531384	572982	41598	IslandPath-DIMOB	rplL	Gt21A_01146	531949	532317	1	50S ribosomal protein L7/L12
531384	572982	41598	IslandPath-DIMOB	xerC_1	Gt21A_01145	532471	533673	-1	Tyrosine recombinase XerC
531384	572982	41598	IslandPath-DIMOB		Gt21A_01142	534174	534605	-1	hypothetical protein
531384	572982	41598	IslandPath-DIMOB		Gt21A_01141	534592	535164	-1	hypothetical protein
531384	572982	41598	IslandPath-DIMOB		Gt21A_01140	535407	535940	-1	hypothetical protein
531384	572982	41598	IslandPath-DIMOB		Gt21A_01139	536043	536441	-1	hypothetical protein
531384	572982	41598	IslandPath-DIMOB	xre_2	Gt21A_01138	536448	536789	-1	HTH-type transcriptional regulator Xre
531384	572982	41598	IslandPath-DIMOB	xre_1	Gt21A_01137	536933	537130	1	HTH-type transcriptional regulator Xre
531384	572982	41598	IslandPath-DIMOB		Gt21A_01136	537156	537275	1	hypothetical protein
531384	572982	41598	IslandPath-DIMOB		Gt21A_01135	537306	537410	1	hypothetical protein
531384	572982	41598	IslandPath-DIMOB		Gt21A_01134	537402	537692	-1	hypothetical protein
531384	572982	41598	IslandPath-DIMOB		Gt21A_01133	537804	538004	1	hypothetical protein
531384	572982	41598	IslandPath-DIMOB		Gt21A_01132	538001	538381	-1	hypothetical protein
531384	572982	41598	IslandPath-DIMOB		Gt21A_01131	538486	538905	-1	hypothetical protein
531384	572982	41598	IslandPath-DIMOB		Gt21A_01130	538985	539167	1	hypothetical protein
531384	572982	41598	IslandPath-DIMOB		Gt21A_01129	539228	539782	1	hypothetical protein
531384	572982	41598	IslandPath-DIMOB		Gt21A_01128	539788	540075	1	hypothetical protein
531384	572982	41598	IslandPath-DIMOB		Gt21A_01127	540185	540313	1	hypothetical protein
531384	572982	41598	IslandPath-DIMOB		Gt21A_01126	540455	540835	1	hypothetical protein
531384	572982	41598	IslandPath-DIMOB	recT	Gt21A_01125	540838	541737	1	Protein RecT
531384	572982	41598	IslandPath-DIMOB		Gt21A_01124	541706	542521	1	hypothetical protein
531384	572982	41598	IslandPath-DIMOB		Gt21A_01123	542600	543505	1	hypothetical protein
531384	572982	41598	IslandPath-DIMOB		Gt21A_01122	543502	543789	1	hypothetical protein
531384	572982	41598	IslandPath-DIMOB		Gt21A_01121	543786	544319	1	hypothetical protein
531384	572982	41598	IslandPath-DIMOB		Gt21A_01120	544312	544731	1	hypothetical protein
531384	572982	41598	IslandPath-DIMOB		Gt21A_01119	544728	544958	1	hypothetical protein
531384	572982	41598	IslandPath-DIMOB		Gt21A_01118	544961	545095	1	hypothetical protein
531384	572982	41598	IslandPath-DIMOB		Gt21A_01117	545092	545439	1	hypothetical protein
531384	572982	41598	IslandPath-DIMOB		Gt21A_01116	545436	545891	1	hypothetical protein
531384	572982	41598	IslandPath-DIMOB		Gt21A_01115	545884	546051	1	hypothetical protein
531384	572982	41598	IslandPath-DIMOB		Gt21A_01114	546182	546640	1	hypothetical protein
531384	572982	41598	IslandPath-DIMOB		Gt21A_01111	547402	548250	1	hypothetical protein
531384	572982	41598	IslandPath-DIMOB		Gt21A_01110	548323	548502	1	hypothetical protein
531384	572982	41598	IslandPath-DIMOB		Gt21A_01109	548471	548743	1	hypothetical protein
531384	572982	41598	IslandPath-DIMOB		Gt21A_01108	548791	549060	1	hypothetical protein
531384	572982	41598	IslandPath-DIMOB		Gt21A_01107	549101	549766	1	hypothetical protein
531384	572982	41598	IslandPath-DIMOB		Gt21A_01106	549747	551072	1	hypothetical protein
531384	572982	41598	IslandPath-DIMOB		Gt21A_01105	551120	552670	1	hypothetical protein
531384	572982	41598	IslandPath-DIMOB		Gt21A_01104	552663	553748	1	hypothetical protein
531384	572982	41598	IslandPath-DIMOB		Gt21A_01103	553812	554414	1	hypothetical protein
531384	572982	41598	IslandPath-DIMOB		Gt21A_01102	554428	555375	1	hypothetical protein
531384	572982	41598	IslandPath-DIMOB		Gt21A_01101	555464	555724	1	hypothetical protein
531384	572982	41598	IslandPath-DIMOB		Gt21A_01100	555735	556139	1	hypothetical protein
531384	572982	41598	IslandPath-DIMOB		Gt21A_01099	556140	556529	1	hypothetical protein
531384	572982	41598	IslandPath-DIMOB		Gt21A_01098	556526	556927	1	hypothetical protein
531384	572982	41598	IslandPath-DIMOB		Gt21A_01097	556927	557352	1	hypothetical protein
531384	572982	41598	IslandPath-DIMOB		Gt21A_01096	557370	557987	1	hypothetical protein
531384	572982	41598	IslandPath-DIMOB		Gt21A_01095	558106	558624	1	hypothetical protein
531384	572982	41598	IslandPath-DIMOB		Gt21A_01094	558621	559262	1	hypothetical protein
531384	572982	41598	IslandPath-DIMOB		Gt21A_01093	559278	564923	1	hypothetical protein
531384	572982	41598	IslandPath-DIMOB		Gt21A_01092	564924	565742	1	hypothetical protein
531384	572982	41598	IslandPath-DIMOB		Gt21A_01091	565754	566881	1	hypothetical protein
531384	572982	41598	IslandPath-DIMOB		Gt21A_01090	566874	567095	1	hypothetical protein
531384	572982	41598	IslandPath-DIMOB		Gt21A_01089	567092	567385	1	hypothetical protein
531384	572982	41598	IslandPath-DIMOB	cpdA_2	Gt21A_01088	567386	569188	1	3',5'-cyclic adenosine monophosphate phosphodiesterase CpdA
531384	572982	41598	IslandPath-DIMOB		Gt21A_01087	569202	569972	1	hypothetical protein
531384	572982	41598	IslandPath-DIMOB		Gt21A_01086	569972	570295	1	hypothetical protein
531384	572982	41598	IslandPath-DIMOB		Gt21A_01085	570292	570438	1	hypothetical protein
531384	572982	41598	IslandPath-DIMOB		Gt21A_01084	570454	571608	1	hypothetical protein
531384	572982	41598	IslandPath-DIMOB		Gt21A_01083	571609	571905	1	hypothetical protein
531384	572982	41598	IslandPath-DIMOB		Gt21A_01082	571892	572251	1	hypothetical protein
531384	572982	41598	IslandPath-DIMOB		Gt21A_01081	572776	572982	-1	hypothetical protein
1101050	1109440	8390	IslandPath-DIMOB		Gt21A_02474	1101050	1101379	1	hypothetical protein
1101050	1109440	8390	IslandPath-DIMOB	dppE_5	Gt21A_02475	1101926	1103569	1	Dipeptide-binding protein DppE
1101050	1109440	8390	IslandPath-DIMOB	oppB	Gt21A_02476	1103727	1104656	1	Oligopeptide transport system permease protein OppB
1101050	1109440	8390	IslandPath-DIMOB	dppC	Gt21A_02477	1104660	1105694	1	Dipeptide transport system permease protein DppC
1101050	1109440	8390	IslandPath-DIMOB	oppD	Gt21A_02478	1105710	1106789	1	Oligopeptide transport ATP-binding protein OppD
1101050	1109440	8390	IslandPath-DIMOB	oppF	Gt21A_02479	1106796	1107761	1	Oligopeptide transport ATP-binding protein OppF
1101050	1109440	8390	IslandPath-DIMOB		Gt21A_02480	1108306	1108695	1	hypothetical protein
1101050	1109440	8390	IslandPath-DIMOB	xerH	Gt21A_02481	1108880	1109440	1	Tyrosine recombinase XerH
1293441	1329068	35627	IslandPath-DIMOB	trmB	Gt21A_03072	1293441	1294085	1	tRNA (guanine-N(7)-)-methyltransferase
1293441	1329068	35627	IslandPath-DIMOB		Gt21A_03071	1294222	1294545	-1	hypothetical protein
1293441	1329068	35627	IslandPath-DIMOB	intQ	Gt21A_03070	1294766	1295908	-1	Putative defective protein IntQ
1293441	1329068	35627	IslandPath-DIMOB		Gt21A_03069	1296498	1296617	-1	hypothetical protein
1293441	1329068	35627	IslandPath-DIMOB		Gt21A_03068	1296653	1296853	-1	hypothetical protein
1293441	1329068	35627	IslandPath-DIMOB		Gt21A_03067	1296859	1297434	-1	hypothetical protein
1293441	1329068	35627	IslandPath-DIMOB	lexA_3	Gt21A_03066	1297560	1298231	-1	LexA repressor
1293441	1329068	35627	IslandPath-DIMOB		Gt21A_03065	1298424	1298639	1	hypothetical protein
1293441	1329068	35627	IslandPath-DIMOB		Gt21A_03064	1298654	1298797	1	hypothetical protein
1293441	1329068	35627	IslandPath-DIMOB		Gt21A_03063	1298744	1298995	-1	hypothetical protein
1293441	1329068	35627	IslandPath-DIMOB		Gt21A_03062	1299062	1299769	1	hypothetical protein
1293441	1329068	35627	IslandPath-DIMOB		Gt21A_03061	1299783	1299971	1	hypothetical protein
1293441	1329068	35627	IslandPath-DIMOB		Gt21A_03060	1299968	1300492	-1	hypothetical protein
1293441	1329068	35627	IslandPath-DIMOB		Gt21A_03059	1300550	1300822	1	hypothetical protein
1293441	1329068	35627	IslandPath-DIMOB		Gt21A_03058	1300878	1300979	1	hypothetical protein
1293441	1329068	35627	IslandPath-DIMOB		Gt21A_03057	1300992	1301240	1	hypothetical protein
1293441	1329068	35627	IslandPath-DIMOB		Gt21A_03056	1301243	1301443	1	hypothetical protein
1293441	1329068	35627	IslandPath-DIMOB		Gt21A_03055	1301455	1301619	1	hypothetical protein
1293441	1329068	35627	IslandPath-DIMOB		Gt21A_03054	1301622	1301768	1	hypothetical protein
1293441	1329068	35627	IslandPath-DIMOB		Gt21A_03053	1301768	1302301	1	hypothetical protein
1293441	1329068	35627	IslandPath-DIMOB		Gt21A_03052	1302310	1302972	1	hypothetical protein
1293441	1329068	35627	IslandPath-DIMOB		Gt21A_03051	1302974	1303645	1	hypothetical protein
1293441	1329068	35627	IslandPath-DIMOB		Gt21A_03050	1303692	1304384	1	hypothetical protein
1293441	1329068	35627	IslandPath-DIMOB		Gt21A_03049	1304371	1304595	1	hypothetical protein
1293441	1329068	35627	IslandPath-DIMOB		Gt21A_03048	1304619	1305473	1	hypothetical protein
1293441	1329068	35627	IslandPath-DIMOB		Gt21A_03047	1305477	1305776	1	hypothetical protein
1293441	1329068	35627	IslandPath-DIMOB		Gt21A_03046	1305777	1305944	1	hypothetical protein
1293441	1329068	35627	IslandPath-DIMOB		Gt21A_03045	1306261	1306638	1	hypothetical protein
1293441	1329068	35627	IslandPath-DIMOB		Gt21A_03044	1306635	1306982	1	hypothetical protein
1293441	1329068	35627	IslandPath-DIMOB		Gt21A_03043	1306979	1307392	1	hypothetical protein
1293441	1329068	35627	IslandPath-DIMOB		Gt21A_03042	1307389	1307559	1	hypothetical protein
1293441	1329068	35627	IslandPath-DIMOB		Gt21A_03041	1307522	1307965	1	hypothetical protein
1293441	1329068	35627	IslandPath-DIMOB		Gt21A_03040	1308633	1309007	1	hypothetical protein
1293441	1329068	35627	IslandPath-DIMOB		Gt21A_03039	1309020	1309526	1	hypothetical protein
1293441	1329068	35627	IslandPath-DIMOB		Gt21A_03038	1309513	1309800	1	hypothetical protein
1293441	1329068	35627	IslandPath-DIMOB		Gt21A_03037	1310004	1310441	1	hypothetical protein
1293441	1329068	35627	IslandPath-DIMOB		Gt21A_03036	1310438	1310950	1	hypothetical protein
1293441	1329068	35627	IslandPath-DIMOB		Gt21A_03035	1310977	1311279	1	hypothetical protein
1293441	1329068	35627	IslandPath-DIMOB		Gt21A_03034	1311281	1311511	1	hypothetical protein
1293441	1329068	35627	IslandPath-DIMOB		Gt21A_03033	1311734	1312168	1	hypothetical protein
1293441	1329068	35627	IslandPath-DIMOB	yqbO_1	Gt21A_01600	1313436	1318187	1	putative protein YqbO
1293441	1329068	35627	IslandPath-DIMOB		Gt21A_01599	1318264	1320033	1	hypothetical protein
1293441	1329068	35627	IslandPath-DIMOB		Gt21A_01598	1320103	1322472	1	hypothetical protein
1293441	1329068	35627	IslandPath-DIMOB		Gt21A_01597	1322489	1325020	1	hypothetical protein
1293441	1329068	35627	IslandPath-DIMOB		Gt21A_01596	1325013	1325264	1	hypothetical protein
1293441	1329068	35627	IslandPath-DIMOB		Gt21A_01595	1325268	1325429	1	hypothetical protein
1293441	1329068	35627	IslandPath-DIMOB		Gt21A_01594	1325413	1325772	1	hypothetical protein
1293441	1329068	35627	IslandPath-DIMOB		Gt21A_01593	1325784	1326956	1	hypothetical protein
1293441	1329068	35627	IslandPath-DIMOB		Gt21A_01592	1326956	1327219	1	hypothetical protein
1293441	1329068	35627	IslandPath-DIMOB		Gt21A_01591	1327231	1327767	1	hypothetical protein
1293441	1329068	35627	IslandPath-DIMOB		Gt21A_01590	1327933	1328100	1	hypothetical protein
1293441	1329068	35627	IslandPath-DIMOB	pheT_2	Gt21A_01589	1328391	1329068	1	Phenylalanine--tRNA ligase beta subunit
1600638	1630452	29814	IslandPath-DIMOB		Gt21A_02769	1600638	1600910	1	hypothetical protein
1600638	1630452	29814	IslandPath-DIMOB		Gt21A_02844	1602221	1602322	1	hypothetical protein
1600638	1630452	29814	IslandPath-DIMOB		Gt21A_02843	1602709	1602954	1	hypothetical protein
1600638	1630452	29814	IslandPath-DIMOB		Gt21A_02842	1602996	1603130	1	hypothetical protein
1600638	1630452	29814	IslandPath-DIMOB		Gt21A_02841	1603146	1603679	1	hypothetical protein
1600638	1630452	29814	IslandPath-DIMOB		Gt21A_02840	1603942	1604085	-1	hypothetical protein
1600638	1630452	29814	IslandPath-DIMOB	lagD_5	Gt21A_02839	1604265	1606421	1	Lactococcin-G-processing and transport ATP-binding protein LagD
1600638	1630452	29814	IslandPath-DIMOB		Gt21A_02838	1606425	1606910	1	hypothetical protein
1600638	1630452	29814	IslandPath-DIMOB		Gt21A_02837	1606928	1607326	1	hypothetical protein
1600638	1630452	29814	IslandPath-DIMOB		Gt21A_02836	1607330	1607692	1	hypothetical protein
1600638	1630452	29814	IslandPath-DIMOB		Gt21A_02835	1609584	1609835	1	hypothetical protein
1600638	1630452	29814	IslandPath-DIMOB		Gt21A_02834	1609889	1610650	1	hypothetical protein
1600638	1630452	29814	IslandPath-DIMOB		Gt21A_02833	1610847	1611671	-1	hypothetical protein
1600638	1630452	29814	IslandPath-DIMOB		Gt21A_02832	1611655	1611915	-1	hypothetical protein
1600638	1630452	29814	IslandPath-DIMOB		Gt21A_02831	1612472	1613293	-1	hypothetical protein
1600638	1630452	29814	IslandPath-DIMOB		Gt21A_02830	1613525	1614838	1	hypothetical protein
1600638	1630452	29814	IslandPath-DIMOB	agrA_6	Gt21A_02829	1614841	1615578	1	Accessory gene regulator A
1600638	1630452	29814	IslandPath-DIMOB		Gt21A_02828	1615859	1616062	1	hypothetical protein
1600638	1630452	29814	IslandPath-DIMOB		Gt21A_02827	1616091	1616270	1	hypothetical protein
1600638	1630452	29814	IslandPath-DIMOB	lagD_4	Gt21A_02826	1616415	1618535	1	Lactococcin-G-processing and transport ATP-binding protein LagD
1600638	1630452	29814	IslandPath-DIMOB		Gt21A_02825	1618538	1621042	1	hypothetical protein
1600638	1630452	29814	IslandPath-DIMOB		Gt21A_02824	1621081	1623771	1	hypothetical protein
1600638	1630452	29814	IslandPath-DIMOB	nisP	Gt21A_02823	1623774	1625123	1	Nisin leader peptide-processing serine protease NisP
1600638	1630452	29814	IslandPath-DIMOB		Gt21A_02822	1625135	1625317	1	hypothetical protein
1600638	1630452	29814	IslandPath-DIMOB	bdb	Gt21A_02821	1625352	1625780	1	Disulfide bond formation protein
1600638	1630452	29814	IslandPath-DIMOB		Gt21A_02820	1626298	1626642	1	hypothetical protein
1600638	1630452	29814	IslandPath-DIMOB		Gt21A_02819	1626686	1626913	1	hypothetical protein
1600638	1630452	29814	IslandPath-DIMOB		Gt21A_02818	1627034	1627285	1	hypothetical protein
1600638	1630452	29814	IslandPath-DIMOB		Gt21A_02817	1627339	1628028	1	hypothetical protein
1600638	1630452	29814	IslandPath-DIMOB		Gt21A_02816	1628058	1628309	1	hypothetical protein
1600638	1630452	29814	IslandPath-DIMOB		Gt21A_02815	1628363	1629115	1	hypothetical protein
1600638	1630452	29814	IslandPath-DIMOB		Gt21A_02814	1629112	1629468	1	hypothetical protein
1600638	1630452	29814	IslandPath-DIMOB		Gt21A_02813	1629595	1630452	-1	hypothetical protein
1661378	1669069	7691	IslandPath-DIMOB	clpY	Gt21A_02787	1661378	1662796	-1	ATP-dependent protease ATPase subunit ClpY
1661378	1669069	7691	IslandPath-DIMOB	hslV	Gt21A_02786	1662814	1663356	-1	ATP-dependent protease subunit HslV
1661378	1669069	7691	IslandPath-DIMOB	xerC_4	Gt21A_02785	1663340	1664284	-1	Tyrosine recombinase XerC
1661378	1669069	7691	IslandPath-DIMOB	trmFO	Gt21A_02784	1664364	1665689	-1	Methylenetetrahydrofolate--tRNA-(uracil-5-)- methyltransferase TrmFO
1661378	1669069	7691	IslandPath-DIMOB	topA_1	Gt21A_02783	1665968	1668115	-1	DNA topoisomerase 1
1661378	1669069	7691	IslandPath-DIMOB	dprA	Gt21A_02782	1668204	1668887	-1	DNA processing protein DprA
1661378	1669069	7691	IslandPath-DIMOB		Gt21A_02781	1668929	1669069	-1	hypothetical protein
1855506	1888110	32604	IslandPath-DIMOB	cmpB	Gt21A_02158	1855506	1857248	-1	Bicarbonate transport system permease protein CmpB
1855506	1888110	32604	IslandPath-DIMOB	rodA_2	Gt21A_03524	1858882	1860093	-1	Peptidoglycan glycosyltransferase RodA
1855506	1888110	32604	IslandPath-DIMOB		Gt21A_03522	1860834	1861367	-1	hypothetical protein
1855506	1888110	32604	IslandPath-DIMOB		Gt21A_03521	1861379	1861642	-1	hypothetical protein
1855506	1888110	32604	IslandPath-DIMOB		Gt21A_03520	1861642	1862472	-1	hypothetical protein
1855506	1888110	32604	IslandPath-DIMOB	smc_5	Gt21A_02361	1864281	1869503	-1	Chromosome partition protein Smc
1855506	1888110	32604	IslandPath-DIMOB		Gt21A_02360	1869516	1869707	-1	hypothetical protein
1855506	1888110	32604	IslandPath-DIMOB		Gt21A_02359	1869704	1870087	-1	hypothetical protein
1855506	1888110	32604	IslandPath-DIMOB		Gt21A_02358	1870289	1870927	-1	hypothetical protein
1855506	1888110	32604	IslandPath-DIMOB		Gt21A_02357	1870928	1871311	-1	hypothetical protein
1855506	1888110	32604	IslandPath-DIMOB		Gt21A_02356	1871308	1871748	-1	hypothetical protein
1855506	1888110	32604	IslandPath-DIMOB		Gt21A_02355	1871738	1872100	-1	hypothetical protein
1855506	1888110	32604	IslandPath-DIMOB		Gt21A_02354	1872084	1872422	-1	hypothetical protein
1855506	1888110	32604	IslandPath-DIMOB		Gt21A_02353	1872495	1873736	-1	hypothetical protein
1855506	1888110	32604	IslandPath-DIMOB	clpP1_2	Gt21A_02352	1873756	1874427	-1	ATP-dependent Clp protease proteolytic subunit 1
1855506	1888110	32604	IslandPath-DIMOB		Gt21A_02351	1874408	1875598	-1	hypothetical protein
1855506	1888110	32604	IslandPath-DIMOB		Gt21A_02350	1875598	1875798	-1	hypothetical protein
1855506	1888110	32604	IslandPath-DIMOB		Gt21A_02349	1875785	1877674	-1	hypothetical protein
1855506	1888110	32604	IslandPath-DIMOB		Gt21A_02348	1877684	1878139	-1	hypothetical protein
1855506	1888110	32604	IslandPath-DIMOB		Gt21A_02347	1878330	1878581	-1	hypothetical protein
1855506	1888110	32604	IslandPath-DIMOB		Gt21A_02346	1878602	1878868	-1	hypothetical protein
1855506	1888110	32604	IslandPath-DIMOB		Gt21A_02345	1878874	1879386	-1	hypothetical protein
1855506	1888110	32604	IslandPath-DIMOB		Gt21A_02344	1879355	1879525	-1	hypothetical protein
1855506	1888110	32604	IslandPath-DIMOB		Gt21A_02343	1879509	1879823	-1	hypothetical protein
1855506	1888110	32604	IslandPath-DIMOB		Gt21A_02341	1880545	1881498	1	hypothetical protein
1855506	1888110	32604	IslandPath-DIMOB		Gt21A_02340	1881503	1881682	-1	hypothetical protein
1855506	1888110	32604	IslandPath-DIMOB		Gt21A_02339	1882282	1882719	-1	hypothetical protein
1855506	1888110	32604	IslandPath-DIMOB		Gt21A_02338	1882784	1882951	-1	hypothetical protein
1855506	1888110	32604	IslandPath-DIMOB		Gt21A_02337	1882944	1883072	-1	hypothetical protein
1855506	1888110	32604	IslandPath-DIMOB		Gt21A_02336	1883069	1883485	-1	hypothetical protein
1855506	1888110	32604	IslandPath-DIMOB		Gt21A_02335	1883482	1883919	-1	hypothetical protein
1855506	1888110	32604	IslandPath-DIMOB		Gt21A_02334	1883949	1884116	-1	hypothetical protein
1855506	1888110	32604	IslandPath-DIMOB		Gt21A_02333	1884119	1884286	-1	hypothetical protein
1855506	1888110	32604	IslandPath-DIMOB		Gt21A_02332	1884290	1884601	-1	hypothetical protein
1855506	1888110	32604	IslandPath-DIMOB		Gt21A_02331	1884607	1884906	-1	hypothetical protein
1855506	1888110	32604	IslandPath-DIMOB		Gt21A_02330	1884884	1885045	-1	hypothetical protein
1855506	1888110	32604	IslandPath-DIMOB	dnaC_1	Gt21A_02329	1885042	1885827	-1	DNA replication protein DnaC
1855506	1888110	32604	IslandPath-DIMOB		Gt21A_02328	1885827	1886660	-1	hypothetical protein
1855506	1888110	32604	IslandPath-DIMOB		Gt21A_02327	1886700	1887005	-1	hypothetical protein
1855506	1888110	32604	IslandPath-DIMOB		Gt21A_02326	1887006	1887176	-1	hypothetical protein
1855506	1888110	32604	IslandPath-DIMOB		Gt21A_02325	1887237	1887449	-1	hypothetical protein
1855506	1888110	32604	IslandPath-DIMOB		Gt21A_02324	1887452	1887706	-1	hypothetical protein
1855506	1888110	32604	IslandPath-DIMOB		Gt21A_02323	1887850	1888110	-1	hypothetical protein
2175396	2220637	45241	IslandPath-DIMOB	icaB	Gt21A_01736	2175396	2176247	1	Poly-beta-1,6-N-acetyl-D-glucosamine N-deacetylase
2175396	2220637	45241	IslandPath-DIMOB		Gt21A_01737	2176244	2176402	-1	hypothetical protein
2175396	2220637	45241	IslandPath-DIMOB		Gt21A_01738	2176976	2177530	-1	hypothetical protein
2175396	2220637	45241	IslandPath-DIMOB		Gt21A_01739	2177542	2177790	-1	hypothetical protein
2175396	2220637	45241	IslandPath-DIMOB	lyc_1	Gt21A_01740	2177791	2178897	-1	Autolytic lysozyme
2175396	2220637	45241	IslandPath-DIMOB		Gt21A_01741	2178915	2179202	-1	hypothetical protein
2175396	2220637	45241	IslandPath-DIMOB		Gt21A_01742	2179195	2180703	-1	hypothetical protein
2175396	2220637	45241	IslandPath-DIMOB		Gt21A_01743	2180720	2183140	-1	hypothetical protein
2175396	2220637	45241	IslandPath-DIMOB		Gt21A_01744	2183152	2186019	-1	hypothetical protein
2175396	2220637	45241	IslandPath-DIMOB	yqbO_2	Gt21A_01745	2186033	2191429	-1	putative protein YqbO
2175396	2220637	45241	IslandPath-DIMOB		Gt21A_01746	2191669	2191995	-1	hypothetical protein
2175396	2220637	45241	IslandPath-DIMOB		Gt21A_01747	2192013	2192891	-1	hypothetical protein
2175396	2220637	45241	IslandPath-DIMOB		Gt21A_01748	2193018	2193641	-1	hypothetical protein
2175396	2220637	45241	IslandPath-DIMOB		Gt21A_01749	2193654	2194028	-1	hypothetical protein
2175396	2220637	45241	IslandPath-DIMOB		Gt21A_01750	2194025	2194462	-1	hypothetical protein
2175396	2220637	45241	IslandPath-DIMOB		Gt21A_01751	2194455	2194802	-1	hypothetical protein
2175396	2220637	45241	IslandPath-DIMOB		Gt21A_01752	2194786	2195136	-1	hypothetical protein
2175396	2220637	45241	IslandPath-DIMOB		Gt21A_01753	2195153	2196358	-1	hypothetical protein
2175396	2220637	45241	IslandPath-DIMOB	clpP1_1	Gt21A_01754	2196361	2197056	-1	ATP-dependent Clp protease proteolytic subunit 1
2175396	2220637	45241	IslandPath-DIMOB		Gt21A_01755	2197046	2198194	-1	hypothetical protein
2175396	2220637	45241	IslandPath-DIMOB		Gt21A_01756	2198195	2198398	-1	hypothetical protein
2175396	2220637	45241	IslandPath-DIMOB		Gt21A_01757	2198400	2200280	-1	hypothetical protein
2175396	2220637	45241	IslandPath-DIMOB		Gt21A_01758	2200273	2200770	-1	hypothetical protein
2175396	2220637	45241	IslandPath-DIMOB		Gt21A_01759	2200920	2201441	-1	hypothetical protein
2175396	2220637	45241	IslandPath-DIMOB		Gt21A_01760	2201449	2201766	-1	hypothetical protein
2175396	2220637	45241	IslandPath-DIMOB		Gt21A_01761	2201793	2202347	-1	hypothetical protein
2175396	2220637	45241	IslandPath-DIMOB		Gt21A_01762	2202683	2202889	1	hypothetical protein
2175396	2220637	45241	IslandPath-DIMOB		Gt21A_01763	2203028	2203219	-1	hypothetical protein
2175396	2220637	45241	IslandPath-DIMOB		Gt21A_01764	2203237	2203461	-1	hypothetical protein
2175396	2220637	45241	IslandPath-DIMOB		Gt21A_01767	2204655	2205104	-1	hypothetical protein
2175396	2220637	45241	IslandPath-DIMOB		Gt21A_01768	2205191	2205391	-1	hypothetical protein
2175396	2220637	45241	IslandPath-DIMOB		Gt21A_01769	2205863	2206027	-1	hypothetical protein
2175396	2220637	45241	IslandPath-DIMOB		Gt21A_01770	2206101	2206697	-1	hypothetical protein
2175396	2220637	45241	IslandPath-DIMOB		Gt21A_01771	2206700	2206804	-1	hypothetical protein
2175396	2220637	45241	IslandPath-DIMOB		Gt21A_01772	2206797	2207177	-1	hypothetical protein
2175396	2220637	45241	IslandPath-DIMOB		Gt21A_01773	2207174	2207692	-1	hypothetical protein
2175396	2220637	45241	IslandPath-DIMOB		Gt21A_01774	2207689	2207976	-1	hypothetical protein
2175396	2220637	45241	IslandPath-DIMOB		Gt21A_01775	2207973	2208878	-1	hypothetical protein
2175396	2220637	45241	IslandPath-DIMOB		Gt21A_01776	2209290	2209418	-1	hypothetical protein
2175396	2220637	45241	IslandPath-DIMOB		Gt21A_01777	2209526	2210038	-1	hypothetical protein
2175396	2220637	45241	IslandPath-DIMOB		Gt21A_01778	2210106	2210411	-1	hypothetical protein
2175396	2220637	45241	IslandPath-DIMOB		Gt21A_01779	2210423	2210593	-1	hypothetical protein
2175396	2220637	45241	IslandPath-DIMOB		Gt21A_01780	2210618	2210752	-1	hypothetical protein
2175396	2220637	45241	IslandPath-DIMOB		Gt21A_01781	2210752	2210952	-1	hypothetical protein
2175396	2220637	45241	IslandPath-DIMOB		Gt21A_01782	2211099	2211335	1	hypothetical protein
2175396	2220637	45241	IslandPath-DIMOB		Gt21A_01783	2211373	2211687	1	hypothetical protein
2175396	2220637	45241	IslandPath-DIMOB		Gt21A_01784	2211760	2211990	-1	hypothetical protein
2175396	2220637	45241	IslandPath-DIMOB	xre_3	Gt21A_01785	2212162	2212524	1	HTH-type transcriptional regulator Xre
2175396	2220637	45241	IslandPath-DIMOB		Gt21A_01786	2212536	2212952	1	hypothetical protein
2175396	2220637	45241	IslandPath-DIMOB		Gt21A_01787	2213024	2213392	1	hypothetical protein
2175396	2220637	45241	IslandPath-DIMOB		Gt21A_01788	2213422	2214123	1	hypothetical protein
2175396	2220637	45241	IslandPath-DIMOB		Gt21A_01790	2214487	2214612	1	hypothetical protein
2175396	2220637	45241	IslandPath-DIMOB	mscL_1	Gt21A_01791	2214773	2215150	1	Large-conductance mechanosensitive channel
2175396	2220637	45241	IslandPath-DIMOB		Gt21A_01792	2215177	2215536	1	hypothetical protein
2175396	2220637	45241	IslandPath-DIMOB	ycnE_1	Gt21A_01793	2215567	2215848	1	Putative monooxygenase YcnE
2175396	2220637	45241	IslandPath-DIMOB		Gt21A_01796	2216175	2217302	1	hypothetical protein
2175396	2220637	45241	IslandPath-DIMOB	xerC_3	Gt21A_01797	2217400	2218521	1	Tyrosine recombinase XerC
2175396	2220637	45241	IslandPath-DIMOB		Gt21A_01799	2218873	2219079	-1	hypothetical protein
2175396	2220637	45241	IslandPath-DIMOB		Gt21A_01801	2219540	2220256	1	hypothetical protein
2175396	2220637	45241	IslandPath-DIMOB		Gt21A_01802	2220362	2220637	-1	hypothetical protein
2572910	2587106	14196	IslandPath-DIMOB		Gt21A_02974	2572910	2573239	-1	hypothetical protein
2572910	2587106	14196	IslandPath-DIMOB		Gt21A_02975	2573269	2574318	-1	hypothetical protein
2572910	2587106	14196	IslandPath-DIMOB		Gt21A_02976	2574315	2574845	-1	hypothetical protein
2572910	2587106	14196	IslandPath-DIMOB		Gt21A_02977	2574895	2576391	-1	Putative multidrug export ATP-binding/permease protein
2572910	2587106	14196	IslandPath-DIMOB		Gt21A_02978	2577640	2578032	1	hypothetical protein
2572910	2587106	14196	IslandPath-DIMOB		Gt21A_00738	2579475	2580218	-1	hypothetical protein
2572910	2587106	14196	IslandPath-DIMOB		Gt21A_00737	2580327	2581271	-1	hypothetical protein
2572910	2587106	14196	IslandPath-DIMOB	lytG_1	Gt21A_00736	2581299	2582417	-1	Exo-glucosaminidase LytG
2572910	2587106	14196	IslandPath-DIMOB		Gt21A_00735	2582431	2582796	-1	hypothetical protein
2572910	2587106	14196	IslandPath-DIMOB		Gt21A_00734	2582827	2583186	-1	hypothetical protein
2572910	2587106	14196	IslandPath-DIMOB		Gt21A_00733	2583462	2583812	-1	hypothetical protein
2572910	2587106	14196	IslandPath-DIMOB		Gt21A_00732	2583853	2584197	-1	hypothetical protein
2572910	2587106	14196	IslandPath-DIMOB	agrA_3	Gt21A_00731	2584385	2585125	-1	Accessory gene regulator A
2572910	2587106	14196	IslandPath-DIMOB		Gt21A_00730	2585118	2586380	-1	hypothetical protein
2572910	2587106	14196	IslandPath-DIMOB		Gt21A_00729	2586394	2586522	-1	hypothetical protein
2572910	2587106	14196	IslandPath-DIMOB	agrB_1	Gt21A_00728	2586522	2587106	-1	Accessory gene regulator protein B
2916115	2936867	20752	IslandPath-DIMOB		Gt21A_00425	2916115	2916282	-1	hypothetical protein
2916115	2936867	20752	IslandPath-DIMOB		Gt21A_00424	2916450	2917148	1	hypothetical protein
2916115	2936867	20752	IslandPath-DIMOB		Gt21A_00423	2918551	2919081	-1	hypothetical protein
2916115	2936867	20752	IslandPath-DIMOB		Gt21A_00422	2919093	2919356	-1	hypothetical protein
2916115	2936867	20752	IslandPath-DIMOB		Gt21A_00421	2919356	2920528	-1	hypothetical protein
2916115	2936867	20752	IslandPath-DIMOB		Gt21A_03205	2921710	2922144	-1	hypothetical protein
2916115	2936867	20752	IslandPath-DIMOB		Gt21A_03206	2922399	2922638	-1	hypothetical protein
2916115	2936867	20752	IslandPath-DIMOB		Gt21A_03207	2922635	2923297	-1	hypothetical protein
2916115	2936867	20752	IslandPath-DIMOB		Gt21A_03208	2923380	2924294	-1	hypothetical protein
2916115	2936867	20752	IslandPath-DIMOB		Gt21A_03209	2924700	2925137	-1	hypothetical protein
2916115	2936867	20752	IslandPath-DIMOB		Gt21A_03210	2925251	2925370	-1	hypothetical protein
2916115	2936867	20752	IslandPath-DIMOB		Gt21A_03211	2925363	2925491	-1	hypothetical protein
2916115	2936867	20752	IslandPath-DIMOB		Gt21A_03212	2925488	2925943	-1	hypothetical protein
2916115	2936867	20752	IslandPath-DIMOB		Gt21A_03213	2925940	2926326	-1	hypothetical protein
2916115	2936867	20752	IslandPath-DIMOB		Gt21A_03214	2926319	2926495	-1	hypothetical protein
2916115	2936867	20752	IslandPath-DIMOB		Gt21A_03215	2926525	2926692	-1	hypothetical protein
2916115	2936867	20752	IslandPath-DIMOB		Gt21A_03216	2926695	2926868	-1	hypothetical protein
2916115	2936867	20752	IslandPath-DIMOB		Gt21A_03217	2926886	2927035	-1	hypothetical protein
2916115	2936867	20752	IslandPath-DIMOB		Gt21A_03218	2927038	2927205	-1	hypothetical protein
2916115	2936867	20752	IslandPath-DIMOB		Gt21A_03219	2927198	2927506	-1	hypothetical protein
2916115	2936867	20752	IslandPath-DIMOB		Gt21A_03220	2927484	2927645	-1	hypothetical protein
2916115	2936867	20752	IslandPath-DIMOB	dnaC_3	Gt21A_03221	2927642	2928427	-1	DNA replication protein DnaC
2916115	2936867	20752	IslandPath-DIMOB		Gt21A_03222	2928427	2929224	-1	hypothetical protein
2916115	2936867	20752	IslandPath-DIMOB		Gt21A_03223	2929323	2929628	-1	hypothetical protein
2916115	2936867	20752	IslandPath-DIMOB		Gt21A_03224	2929629	2929799	-1	hypothetical protein
2916115	2936867	20752	IslandPath-DIMOB		Gt21A_03225	2929860	2930072	-1	hypothetical protein
2916115	2936867	20752	IslandPath-DIMOB		Gt21A_03226	2930075	2930329	-1	hypothetical protein
2916115	2936867	20752	IslandPath-DIMOB		Gt21A_03227	2930342	2930443	-1	hypothetical protein
2916115	2936867	20752	IslandPath-DIMOB		Gt21A_03228	2930495	2930767	-1	hypothetical protein
2916115	2936867	20752	IslandPath-DIMOB		Gt21A_03229	2930826	2931020	1	hypothetical protein
2916115	2936867	20752	IslandPath-DIMOB		Gt21A_03230	2931642	2931809	-1	hypothetical protein
2916115	2936867	20752	IslandPath-DIMOB		Gt21A_03231	2931857	2932546	-1	hypothetical protein
2916115	2936867	20752	IslandPath-DIMOB		Gt21A_03232	2932562	2932765	-1	hypothetical protein
2916115	2936867	20752	IslandPath-DIMOB		Gt21A_03233	2933023	2933442	1	hypothetical protein
2916115	2936867	20752	IslandPath-DIMOB		Gt21A_03234	2933461	2933889	1	hypothetical protein
2916115	2936867	20752	IslandPath-DIMOB	kcsA_2	Gt21A_03235	2933964	2934698	1	pH-gated potassium channel KcsA
2916115	2936867	20752	IslandPath-DIMOB		Gt21A_03236	2934701	2934919	1	hypothetical protein
2916115	2936867	20752	IslandPath-DIMOB		Gt21A_03237	2935093	2935239	1	hypothetical protein
2916115	2936867	20752	IslandPath-DIMOB		Gt21A_03238	2935492	2935680	1	hypothetical protein
2916115	2936867	20752	IslandPath-DIMOB		Gt21A_03239	2935811	2935987	1	hypothetical protein
2916115	2936867	20752	IslandPath-DIMOB		Gt21A_03240	2936113	2936370	1	hypothetical protein
2916115	2936867	20752	IslandPath-DIMOB		Gt21A_03241	2936553	2936867	1	hypothetical protein
3243167	3259421	16254	IslandPath-DIMOB	glpR_1	Gt21A_00742	3243167	3243946	-1	Glycerol-3-phosphate regulon repressor
3243167	3259421	16254	IslandPath-DIMOB		Gt21A_00741	3244219	3244563	1	hypothetical protein
3243167	3259421	16254	IslandPath-DIMOB		Gt21A_00740	3244683	3245198	1	hypothetical protein
3243167	3259421	16254	IslandPath-DIMOB		Gt21A_00739	3245168	3245512	-1	hypothetical protein
3243167	3259421	16254	IslandPath-DIMOB		Gt21A_02603	3246883	3247329	-1	hypothetical protein
3243167	3259421	16254	IslandPath-DIMOB	levS_4	Gt21A_02602	3247344	3247829	-1	Levansucrase
3243167	3259421	16254	IslandPath-DIMOB		Gt21A_02601	3247830	3248057	-1	hypothetical protein
3243167	3259421	16254	IslandPath-DIMOB		Gt21A_02600	3248189	3248764	-1	hypothetical protein
3243167	3259421	16254	IslandPath-DIMOB		Gt21A_02599	3248867	3249316	-1	hypothetical protein
3243167	3259421	16254	IslandPath-DIMOB	btr_3	Gt21A_02598	3249554	3250291	1	HTH-type transcriptional activator Btr
3243167	3259421	16254	IslandPath-DIMOB		Gt21A_02597	3250980	3251315	1	hypothetical protein
3243167	3259421	16254	IslandPath-DIMOB		Gt21A_02596	3251327	3251536	-1	hypothetical protein
3243167	3259421	16254	IslandPath-DIMOB		Gt21A_02595	3251676	3251885	-1	hypothetical protein
3243167	3259421	16254	IslandPath-DIMOB	levS_3	Gt21A_02594	3252220	3252771	-1	Levansucrase
3243167	3259421	16254	IslandPath-DIMOB		Gt21A_02593	3255462	3255734	1	hypothetical protein
3243167	3259421	16254	IslandPath-DIMOB	toxA	Gt21A_02592	3255682	3258162	1	Toxin A
3243167	3259421	16254	IslandPath-DIMOB		Gt21A_02591	3258128	3258385	1	hypothetical protein
3243167	3259421	16254	IslandPath-DIMOB	dinB_3	Gt21A_02590	3258867	3259421	1	DNA polymerase IV
3326206	3337003	10797	IslandPath-DIMOB	dnaA	Gt21A_02535	3326206	3327573	1	Chromosomal replication initiator protein DnaA
3326206	3337003	10797	IslandPath-DIMOB	dnaN	Gt21A_02534	3327751	3328890	1	Beta sliding clamp
3326206	3337003	10797	IslandPath-DIMOB		Gt21A_02533	3329415	3329648	1	hypothetical protein
3326206	3337003	10797	IslandPath-DIMOB	recF	Gt21A_02532	3329649	3330773	1	DNA replication and repair protein RecF
3326206	3337003	10797	IslandPath-DIMOB	gyrB	Gt21A_02531	3330770	3332716	1	DNA gyrase subunit B
3326206	3337003	10797	IslandPath-DIMOB	gyrA	Gt21A_02530	3332881	3335442	1	DNA gyrase subunit A
3326206	3337003	10797	IslandPath-DIMOB	rpsF	Gt21A_02529	3336065	3336364	1	30S ribosomal protein S6
3326206	3337003	10797	IslandPath-DIMOB	ssbA	Gt21A_02528	3336401	3337003	1	Single-stranded DNA-binding protein A
3368972	3379282	10310	IslandPath-DIMOB		Gt21A_02497	3368824	3369000	1	hypothetical protein
3368972	3379282	10310	IslandPath-DIMOB		Gt21A_02496	3368972	3369391	1	hypothetical protein
3368972	3379282	10310	IslandPath-DIMOB		Gt21A_02495	3369415	3369597	1	hypothetical protein
3368972	3379282	10310	IslandPath-DIMOB		Gt21A_02494	3369607	3369945	1	hypothetical protein
3368972	3379282	10310	IslandPath-DIMOB		Gt21A_02493	3369938	3370327	1	hypothetical protein
3368972	3379282	10310	IslandPath-DIMOB		Gt21A_03404	3372493	3372924	-1	Putative universal stress protein
3368972	3379282	10310	IslandPath-DIMOB	mntH_5	Gt21A_03403	3372924	3374516	-1	Divalent metal cation transporter MntH
3368972	3379282	10310	IslandPath-DIMOB		Gt21A_03402	3374550	3375116	1	hypothetical protein
3368972	3379282	10310	IslandPath-DIMOB	mazF	Gt21A_03401	3375718	3376065	-1	Endoribonuclease toxin MazF
3368972	3379282	10310	IslandPath-DIMOB		Gt21A_03400	3376065	3376328	-1	hypothetical protein
3368972	3379282	10310	IslandPath-DIMOB		Gt21A_03399	3376406	3376993	1	hypothetical protein
3368972	3379282	10310	IslandPath-DIMOB		Gt21A_03398	3377356	3377517	1	hypothetical protein
3368972	3379282	10310	IslandPath-DIMOB		Gt21A_03397	3379040	3379282	-1	hypothetical protein
3387079	3401909	14830	IslandPath-DIMOB		Gt21A_03389	3387079	3387534	-1	hypothetical protein
3387079	3401909	14830	IslandPath-DIMOB		Gt21A_03388	3388791	3388988	-1	hypothetical protein
3387079	3401909	14830	IslandPath-DIMOB		Gt21A_03387	3389000	3389269	-1	hypothetical protein
3387079	3401909	14830	IslandPath-DIMOB		Gt21A_03386	3389294	3389575	-1	hypothetical protein
3387079	3401909	14830	IslandPath-DIMOB		Gt21A_03385	3389610	3389993	-1	hypothetical protein
3387079	3401909	14830	IslandPath-DIMOB		Gt21A_03384	3390170	3390310	-1	hypothetical protein
3387079	3401909	14830	IslandPath-DIMOB		Gt21A_03383	3390892	3391536	-1	hypothetical protein
3387079	3401909	14830	IslandPath-DIMOB		Gt21A_03382	3391598	3391744	-1	hypothetical protein
3387079	3401909	14830	IslandPath-DIMOB		Gt21A_03381	3393154	3393249	1	hypothetical protein
3387079	3401909	14830	IslandPath-DIMOB		Gt21A_03380	3393467	3393709	-1	hypothetical protein
3387079	3401909	14830	IslandPath-DIMOB		Gt21A_03379	3393716	3393835	-1	hypothetical protein
3387079	3401909	14830	IslandPath-DIMOB		Gt21A_03378	3393905	3394213	-1	hypothetical protein
3387079	3401909	14830	IslandPath-DIMOB	soj_2	Gt21A_03377	3394206	3395036	-1	Sporulation initiation inhibitor protein Soj
3387079	3401909	14830	IslandPath-DIMOB		Gt21A_03376	3396057	3396416	1	hypothetical protein
3387079	3401909	14830	IslandPath-DIMOB		Gt21A_03375	3397347	3397802	1	hypothetical protein
3387079	3401909	14830	IslandPath-DIMOB		Gt21A_03374	3397939	3398154	1	hypothetical protein
3387079	3401909	14830	IslandPath-DIMOB		Gt21A_03373	3398200	3398955	1	hypothetical protein
3387079	3401909	14830	IslandPath-DIMOB		Gt21A_03372	3399082	3399363	-1	hypothetical protein
3387079	3401909	14830	IslandPath-DIMOB		Gt21A_03371	3399377	3399589	-1	hypothetical protein
3387079	3401909	14830	IslandPath-DIMOB	mobA	Gt21A_03370	3399810	3401909	1	Mobilization protein A
3428974	3464660	35686	IslandPath-DIMOB		Gt21A_03357	3428974	3429579	1	hypothetical protein
3428974	3464660	35686	IslandPath-DIMOB		Gt21A_03358	3429554	3429826	1	hypothetical protein
3428974	3464660	35686	IslandPath-DIMOB		Gt21A_03359	3429897	3430211	1	hypothetical protein
3428974	3464660	35686	IslandPath-DIMOB		Gt21A_03360	3430235	3430456	1	hypothetical protein
3428974	3464660	35686	IslandPath-DIMOB		Gt21A_03361	3430475	3435019	1	hypothetical protein
3428974	3464660	35686	IslandPath-DIMOB		Gt21A_03362	3435023	3435844	1	hypothetical protein
3428974	3464660	35686	IslandPath-DIMOB		Gt21A_03363	3435864	3439667	1	hypothetical protein
3428974	3464660	35686	IslandPath-DIMOB		Gt21A_03364	3439690	3440175	1	hypothetical protein
3428974	3464660	35686	IslandPath-DIMOB		Gt21A_03365	3440177	3440611	1	hypothetical protein
3428974	3464660	35686	IslandPath-DIMOB		Gt21A_03366	3440673	3441011	1	hypothetical protein
3428974	3464660	35686	IslandPath-DIMOB		Gt21A_03367	3441014	3441208	1	hypothetical protein
3428974	3464660	35686	IslandPath-DIMOB		Gt21A_03368	3441208	3441492	1	hypothetical protein
3428974	3464660	35686	IslandPath-DIMOB	lyc_2	Gt21A_03369	3441492	3442385	1	Autolytic lysozyme
3428974	3464660	35686	IslandPath-DIMOB	yusO	Gt21A_03103	3444011	3444448	-1	putative HTH-type transcriptional regulator YusO
3428974	3464660	35686	IslandPath-DIMOB	levS_5	Gt21A_03104	3444460	3447177	-1	Levansucrase
3428974	3464660	35686	IslandPath-DIMOB	birA_3	Gt21A_03105	3447612	3448616	-1	Bifunctional ligase/repressor BirA
3428974	3464660	35686	IslandPath-DIMOB	bioY_2	Gt21A_03106	3448653	3449210	-1	Biotin transporter BioY
3428974	3464660	35686	IslandPath-DIMOB		Gt21A_03107	3449325	3449882	1	hypothetical protein
3428974	3464660	35686	IslandPath-DIMOB		Gt21A_03108	3450448	3450561	1	hypothetical protein
3428974	3464660	35686	IslandPath-DIMOB		Gt21A_03109	3450767	3451135	-1	hypothetical protein
3428974	3464660	35686	IslandPath-DIMOB	mprA_3	Gt21A_03110	3451128	3451661	-1	Transcriptional repressor MprA
3428974	3464660	35686	IslandPath-DIMOB		Gt21A_03111	3451849	3452178	-1	hypothetical protein
3428974	3464660	35686	IslandPath-DIMOB		Gt21A_03112	3452317	3452724	-1	hypothetical protein
3428974	3464660	35686	IslandPath-DIMOB	hsrA_2	Gt21A_03113	3452837	3454198	1	putative transport protein HsrA
3428974	3464660	35686	IslandPath-DIMOB		Gt21A_03114	3454799	3455077	1	hypothetical protein
3428974	3464660	35686	IslandPath-DIMOB	hprA	Gt21A_03115	3455684	3456646	-1	Glycerate dehydrogenase
3428974	3464660	35686	IslandPath-DIMOB		Gt21A_03116	3456899	3457444	-1	hypothetical protein
3428974	3464660	35686	IslandPath-DIMOB		Gt21A_03117	3457831	3457968	1	hypothetical protein
3428974	3464660	35686	IslandPath-DIMOB		Gt21A_03118	3458145	3458612	-1	hypothetical protein
3428974	3464660	35686	IslandPath-DIMOB	lysN_2	Gt21A_03119	3458831	3459160	1	2-aminoadipate transaminase
3428974	3464660	35686	IslandPath-DIMOB		Gt21A_03120	3459749	3460861	1	hypothetical protein
3428974	3464660	35686	IslandPath-DIMOB		Gt21A_03121	3461272	3461670	1	hypothetical protein
3428974	3464660	35686	IslandPath-DIMOB		Gt21A_03122	3462191	3462472	-1	hypothetical protein
3428974	3464660	35686	IslandPath-DIMOB		Gt21A_03123	3462472	3462933	-1	hypothetical protein
3428974	3464660	35686	IslandPath-DIMOB	qacC_1	Gt21A_03124	3463043	3463345	1	Quaternary ammonium compound-resistance protein QacC
3428974	3464660	35686	IslandPath-DIMOB		Gt21A_03125	3464089	3464397	-1	hypothetical protein
3428974	3464660	35686	IslandPath-DIMOB		Gt21A_03126	3464412	3464660	-1	hypothetical protein
3473781	3513053	39272	IslandPath-DIMOB		Gt21A_03135	3473781	3474233	-1	hypothetical protein
3473781	3513053	39272	IslandPath-DIMOB		Gt21A_03136	3474249	3474347	-1	hypothetical protein
3473781	3513053	39272	IslandPath-DIMOB	rpmF	Gt21A_03137	3474830	3475009	1	50S ribosomal protein L32
3473781	3513053	39272	IslandPath-DIMOB		Gt21A_03138	3475036	3475338	1	hypothetical protein
3473781	3513053	39272	IslandPath-DIMOB	rpmGA_2	Gt21A_03139	3475361	3475510	1	50S ribosomal protein L33 1
3473781	3513053	39272	IslandPath-DIMOB	rpsN2_2	Gt21A_03140	3475533	3475802	1	Alternate 30S ribosomal protein S14
3473781	3513053	39272	IslandPath-DIMOB		Gt21A_03141	3475833	3475961	1	hypothetical protein
3473781	3513053	39272	IslandPath-DIMOB	cwlC	Gt21A_03142	3476043	3476894	1	Sporulation-specific N-acetylmuramoyl-L-alanine amidase
3473781	3513053	39272	IslandPath-DIMOB	psaA_1	Gt21A_03143	3476948	3477859	1	Manganese ABC transporter substrate-binding lipoprotein
3473781	3513053	39272	IslandPath-DIMOB		Gt21A_03144	3478034	3479365	-1	hypothetical protein
3473781	3513053	39272	IslandPath-DIMOB		Gt21A_03145	3479522	3480424	-1	hypothetical protein
3473781	3513053	39272	IslandPath-DIMOB	bin3_1	Gt21A_03146	3480512	3481144	-1	Putative transposon Tn552 DNA-invertase bin3
3473781	3513053	39272	IslandPath-DIMOB		Gt21A_03147	3481727	3481975	-1	hypothetical protein
3473781	3513053	39272	IslandPath-DIMOB		Gt21A_03148	3482311	3482700	-1	hypothetical protein
3473781	3513053	39272	IslandPath-DIMOB		Gt21A_03149	3482899	3483195	-1	hypothetical protein
3473781	3513053	39272	IslandPath-DIMOB		Gt21A_03150	3483398	3483577	-1	hypothetical protein
3473781	3513053	39272	IslandPath-DIMOB	ywrO	Gt21A_03151	3483584	3484276	-1	General stress protein 14
3473781	3513053	39272	IslandPath-DIMOB	bin3_2	Gt21A_03152	3484747	3485367	-1	Putative transposon Tn552 DNA-invertase bin3
3473781	3513053	39272	IslandPath-DIMOB		Gt21A_03153	3485649	3486206	1	hypothetical protein
3473781	3513053	39272	IslandPath-DIMOB		Gt21A_03154	3486209	3487225	1	hypothetical protein
3473781	3513053	39272	IslandPath-DIMOB		Gt21A_03155	3487246	3487476	1	hypothetical protein
3473781	3513053	39272	IslandPath-DIMOB	mntH_4	Gt21A_03156	3488537	3489823	-1	Divalent metal cation transporter MntH
3473781	3513053	39272	IslandPath-DIMOB		Gt21A_03157	3490508	3490681	1	hypothetical protein
3473781	3513053	39272	IslandPath-DIMOB		Gt21A_03158	3491285	3492400	-1	Endoglucanase
3473781	3513053	39272	IslandPath-DIMOB	pgaC_3	Gt21A_03159	3492420	3493730	-1	Poly-beta-1,6-N-acetyl-D-glucosamine synthase
3473781	3513053	39272	IslandPath-DIMOB		Gt21A_03160	3493874	3494731	-1	hypothetical protein
3473781	3513053	39272	IslandPath-DIMOB	proX	Gt21A_03452	3496139	3496621	1	Prolyl-tRNA editing protein ProX
3473781	3513053	39272	IslandPath-DIMOB	mepA_3	Gt21A_03451	3496618	3497943	1	Multidrug export protein MepA
3473781	3513053	39272	IslandPath-DIMOB		Gt21A_03450	3498301	3499257	-1	hypothetical protein
3473781	3513053	39272	IslandPath-DIMOB		Gt21A_03449	3499317	3499760	-1	hypothetical protein
3473781	3513053	39272	IslandPath-DIMOB	umuC	Gt21A_03448	3500333	3501634	1	Protein UmuC
3473781	3513053	39272	IslandPath-DIMOB		Gt21A_03447	3501627	3501947	1	hypothetical protein
3473781	3513053	39272	IslandPath-DIMOB		Gt21A_03446	3501940	3502305	1	hypothetical protein
3473781	3513053	39272	IslandPath-DIMOB	hsrA_3	Gt21A_03445	3502489	3503868	1	putative transport protein HsrA
3473781	3513053	39272	IslandPath-DIMOB	yedJ_2	Gt21A_03444	3503875	3504537	1	putative protein YedJ
3473781	3513053	39272	IslandPath-DIMOB	ahcY	Gt21A_03443	3504527	3505681	1	Adenosylhomocysteinase
3473781	3513053	39272	IslandPath-DIMOB		Gt21A_03442	3505876	3506613	-1	hypothetical protein
3473781	3513053	39272	IslandPath-DIMOB		Gt21A_03441	3506967	3507929	1	hypothetical protein
3473781	3513053	39272	IslandPath-DIMOB		Gt21A_03440	3508322	3509194	-1	hypothetical protein
3473781	3513053	39272	IslandPath-DIMOB		Gt21A_03439	3509198	3509413	-1	hypothetical protein
3473781	3513053	39272	IslandPath-DIMOB	topB_2	Gt21A_03438	3509535	3510440	-1	DNA topoisomerase 3
3473781	3513053	39272	IslandPath-DIMOB	bin3_3	Gt21A_03437	3511837	3512454	1	Putative transposon Tn552 DNA-invertase bin3
3473781	3513053	39272	IslandPath-DIMOB		Gt21A_03436	3512835	3513053	-1	hypothetical protein
3520807	3582872	62065	IslandPath-DIMOB	gatB_3	Gt21A_03426	3520807	3521094	1	PTS system galactitol-specific EIIB component
3520807	3582872	62065	IslandPath-DIMOB		Gt21A_03425	3521749	3522006	-1	hypothetical protein
3520807	3582872	62065	IslandPath-DIMOB		Gt21A_03424	3521987	3522448	-1	hypothetical protein
3520807	3582872	62065	IslandPath-DIMOB	ant1_2	Gt21A_03423	3522617	3523381	-1	Streptomycin 3''-adenylyltransferase
3520807	3582872	62065	IslandPath-DIMOB		Gt21A_03422	3523508	3524647	-1	hypothetical protein
3520807	3582872	62065	IslandPath-DIMOB		Gt21A_03421	3525067	3526191	-1	hypothetical protein
3520807	3582872	62065	IslandPath-DIMOB		Gt21A_03420	3526195	3526410	-1	hypothetical protein
3520807	3582872	62065	IslandPath-DIMOB	topB_1	Gt21A_03419	3526532	3527077	-1	DNA topoisomerase 3
3520807	3582872	62065	IslandPath-DIMOB	topA_2	Gt21A_03418	3527074	3527439	-1	DNA topoisomerase 1
3520807	3582872	62065	IslandPath-DIMOB		Gt21A_03453	3534321	3534923	1	hypothetical protein
3520807	3582872	62065	IslandPath-DIMOB		Gt21A_03454	3535011	3535622	1	hypothetical protein
3520807	3582872	62065	IslandPath-DIMOB		Gt21A_03455	3535615	3536409	1	hypothetical protein
3520807	3582872	62065	IslandPath-DIMOB		Gt21A_03456	3536457	3536795	1	hypothetical protein
3520807	3582872	62065	IslandPath-DIMOB		Gt21A_03457	3536900	3537268	1	hypothetical protein
3520807	3582872	62065	IslandPath-DIMOB	higA1	Gt21A_03458	3537265	3537525	1	Antitoxin HigA1
3520807	3582872	62065	IslandPath-DIMOB		Gt21A_03459	3537597	3537995	-1	hypothetical protein
3520807	3582872	62065	IslandPath-DIMOB		Gt21A_03460	3538799	3539068	-1	hypothetical protein
3520807	3582872	62065	IslandPath-DIMOB	soj_3	Gt21A_03461	3539055	3539957	-1	Sporulation initiation inhibitor protein Soj
3520807	3582872	62065	IslandPath-DIMOB		Gt21A_03462	3540826	3542358	1	hypothetical protein
3520807	3582872	62065	IslandPath-DIMOB		Gt21A_03463	3542846	3543397	1	hypothetical protein
3520807	3582872	62065	IslandPath-DIMOB		Gt21A_03464	3543399	3544391	1	hypothetical protein
3520807	3582872	62065	IslandPath-DIMOB		Gt21A_03465	3545460	3545885	1	hypothetical protein
3520807	3582872	62065	IslandPath-DIMOB		Gt21A_03466	3545875	3546159	-1	hypothetical protein
3520807	3582872	62065	IslandPath-DIMOB		Gt21A_03513	3549039	3550151	1	hypothetical protein
3520807	3582872	62065	IslandPath-DIMOB		Gt21A_03514	3550218	3552587	1	hypothetical protein
3520807	3582872	62065	IslandPath-DIMOB		Gt21A_03515	3552604	3555135	1	hypothetical protein
3520807	3582872	62065	IslandPath-DIMOB	iap_4	Gt21A_03516	3556948	3561654	-1	putative endopeptidase p60
3520807	3582872	62065	IslandPath-DIMOB		Gt21A_03405	3564039	3564704	-1	hypothetical protein
3520807	3582872	62065	IslandPath-DIMOB		Gt21A_03406	3566823	3567506	-1	hypothetical protein
3520807	3582872	62065	IslandPath-DIMOB		Gt21A_03407	3567581	3568474	-1	hypothetical protein
3520807	3582872	62065	IslandPath-DIMOB		Gt21A_03408	3568490	3569098	-1	hypothetical protein
3520807	3582872	62065	IslandPath-DIMOB	iap_3	Gt21A_03409	3569121	3570203	-1	putative endopeptidase p60
3520807	3582872	62065	IslandPath-DIMOB		Gt21A_03410	3570204	3572159	-1	hypothetical protein
3520807	3582872	62065	IslandPath-DIMOB		Gt21A_03411	3572171	3572530	-1	hypothetical protein
3520807	3582872	62065	IslandPath-DIMOB		Gt21A_03412	3572531	3572707	-1	hypothetical protein
3520807	3582872	62065	IslandPath-DIMOB		Gt21A_03413	3572707	3575187	-1	hypothetical protein
3520807	3582872	62065	IslandPath-DIMOB		Gt21A_03414	3575651	3575983	-1	hypothetical protein
3520807	3582872	62065	IslandPath-DIMOB		Gt21A_03415	3575999	3576949	-1	hypothetical protein
3520807	3582872	62065	IslandPath-DIMOB		Gt21A_03416	3577020	3577313	-1	hypothetical protein
3520807	3582872	62065	IslandPath-DIMOB		Gt21A_03417	3578208	3578915	-1	hypothetical protein
3520807	3582872	62065	IslandPath-DIMOB		Gt21A_03497	3580025	3580216	-1	hypothetical protein
3520807	3582872	62065	IslandPath-DIMOB		Gt21A_03498	3580255	3580677	-1	hypothetical protein
3520807	3582872	62065	IslandPath-DIMOB		Gt21A_03499	3580699	3581352	-1	hypothetical protein
3520807	3582872	62065	IslandPath-DIMOB		Gt21A_03500	3581369	3581749	-1	hypothetical protein
3520807	3582872	62065	IslandPath-DIMOB		Gt21A_03501	3581749	3582156	-1	hypothetical protein
3520807	3582872	62065	IslandPath-DIMOB		Gt21A_03502	3582606	3582872	-1	hypothetical protein
322200	329441	7241	SIGI-HMM		Gt21A_00304	322200	322400	1	hypothetical protein
322200	329441	7241	SIGI-HMM		Gt21A_00305	322590	322763	1	hypothetical protein
322200	329441	7241	SIGI-HMM		Gt21A_00306	322931	323155	1	hypothetical protein
322200	329441	7241	SIGI-HMM		Gt21A_00307	323180	323332	-1	hypothetical protein
322200	329441	7241	SIGI-HMM		Gt21A_00308	323357	324025	-1	hypothetical protein
322200	329441	7241	SIGI-HMM		Gt21A_00309	324135	324350	-1	hypothetical protein
322200	329441	7241	SIGI-HMM		Gt21A_00310	325217	325417	1	hypothetical protein
322200	329441	7241	SIGI-HMM		Gt21A_00311	325545	325712	1	hypothetical protein
322200	329441	7241	SIGI-HMM	sunS	Gt21A_00312	325830	327029	1	SPBc2 prophage-derived glycosyltransferase SunS
322200	329441	7241	SIGI-HMM		Gt21A_00313	327060	327806	1	hypothetical protein
322200	329441	7241	SIGI-HMM		Gt21A_00314	327938	328087	1	hypothetical protein
322200	329441	7241	SIGI-HMM	citA	Gt21A_00315	328101	329441	1	Sensor histidine kinase CitA
495060	500937	5877	SIGI-HMM	panD	Gt21A_01183	494671	495063	1	Aspartate 1-decarboxylase
495060	500937	5877	SIGI-HMM		Gt21A_01182	495060	496052	1	hypothetical protein
495060	500937	5877	SIGI-HMM	tycB	Gt21A_01181	496045	498462	1	Tyrocidine synthase 2
495060	500937	5877	SIGI-HMM	sfp_1	Gt21A_01180	498459	499103	1	4'-phosphopantetheinyl transferase Sfp
495060	500937	5877	SIGI-HMM		Gt21A_01179	499190	499573	1	hypothetical protein
495060	500937	5877	SIGI-HMM		Gt21A_01178	499696	500937	1	hypothetical protein
536448	540835	4387	SIGI-HMM	xre_2	Gt21A_01138	536448	536789	-1	HTH-type transcriptional regulator Xre
536448	540835	4387	SIGI-HMM	xre_1	Gt21A_01137	536933	537130	1	HTH-type transcriptional regulator Xre
536448	540835	4387	SIGI-HMM		Gt21A_01136	537156	537275	1	hypothetical protein
536448	540835	4387	SIGI-HMM		Gt21A_01135	537306	537410	1	hypothetical protein
536448	540835	4387	SIGI-HMM		Gt21A_01134	537402	537692	-1	hypothetical protein
536448	540835	4387	SIGI-HMM		Gt21A_01133	537804	538004	1	hypothetical protein
536448	540835	4387	SIGI-HMM		Gt21A_01132	538001	538381	-1	hypothetical protein
536448	540835	4387	SIGI-HMM		Gt21A_01131	538486	538905	-1	hypothetical protein
536448	540835	4387	SIGI-HMM		Gt21A_01130	538985	539167	1	hypothetical protein
536448	540835	4387	SIGI-HMM		Gt21A_01129	539228	539782	1	hypothetical protein
536448	540835	4387	SIGI-HMM		Gt21A_01128	539788	540075	1	hypothetical protein
536448	540835	4387	SIGI-HMM		Gt21A_01127	540185	540313	1	hypothetical protein
536448	540835	4387	SIGI-HMM		Gt21A_01126	540455	540835	1	hypothetical protein
1038951	1049070	10119	SIGI-HMM		Gt21A_02415	1038235	1038990	-1	hypothetical protein
1038951	1049070	10119	SIGI-HMM		Gt21A_02416	1038951	1039295	-1	hypothetical protein
1038951	1049070	10119	SIGI-HMM		Gt21A_02417	1041106	1041762	1	hypothetical protein
1038951	1049070	10119	SIGI-HMM	yveL	Gt21A_02418	1041778	1042368	1	Putative tyrosine-protein kinase YveL
1038951	1049070	10119	SIGI-HMM		Gt21A_02419	1042355	1043500	1	hypothetical protein
1038951	1049070	10119	SIGI-HMM	wfgD	Gt21A_02420	1043523	1044476	1	UDP-Glc:alpha-D-GlcNAc-diphosphoundecaprenol beta-1,3-glucosyltransferase WfgD
1038951	1049070	10119	SIGI-HMM		Gt21A_02421	1044481	1045785	1	hypothetical protein
1038951	1049070	10119	SIGI-HMM		Gt21A_02422	1045808	1047208	1	hypothetical protein
1038951	1049070	10119	SIGI-HMM	glgM	Gt21A_02423	1047249	1048328	1	Alpha-maltose-1-phosphate synthase
1038951	1049070	10119	SIGI-HMM		Gt21A_02424	1048360	1049070	1	hypothetical protein
1606425	1615578	9153	SIGI-HMM		Gt21A_02838	1606425	1606910	1	hypothetical protein
1606425	1615578	9153	SIGI-HMM		Gt21A_02837	1606928	1607326	1	hypothetical protein
1606425	1615578	9153	SIGI-HMM		Gt21A_02836	1607330	1607692	1	hypothetical protein
1606425	1615578	9153	SIGI-HMM		Gt21A_02835	1609584	1609835	1	hypothetical protein
1606425	1615578	9153	SIGI-HMM		Gt21A_02834	1609889	1610650	1	hypothetical protein
1606425	1615578	9153	SIGI-HMM		Gt21A_02833	1610847	1611671	-1	hypothetical protein
1606425	1615578	9153	SIGI-HMM		Gt21A_02832	1611655	1611915	-1	hypothetical protein
1606425	1615578	9153	SIGI-HMM		Gt21A_02831	1612472	1613293	-1	hypothetical protein
1606425	1615578	9153	SIGI-HMM		Gt21A_02830	1613525	1614838	1	hypothetical protein
1606425	1615578	9153	SIGI-HMM	agrA_6	Gt21A_02829	1614841	1615578	1	Accessory gene regulator A
1616415	1628309	11894	SIGI-HMM	lagD_4	Gt21A_02826	1616415	1618535	1	Lactococcin-G-processing and transport ATP-binding protein LagD
1616415	1628309	11894	SIGI-HMM		Gt21A_02825	1618538	1621042	1	hypothetical protein
1616415	1628309	11894	SIGI-HMM		Gt21A_02824	1621081	1623771	1	hypothetical protein
1616415	1628309	11894	SIGI-HMM	nisP	Gt21A_02823	1623774	1625123	1	Nisin leader peptide-processing serine protease NisP
1616415	1628309	11894	SIGI-HMM		Gt21A_02822	1625135	1625317	1	hypothetical protein
1616415	1628309	11894	SIGI-HMM	bdb	Gt21A_02821	1625352	1625780	1	Disulfide bond formation protein
1616415	1628309	11894	SIGI-HMM		Gt21A_02820	1626298	1626642	1	hypothetical protein
1616415	1628309	11894	SIGI-HMM		Gt21A_02819	1626686	1626913	1	hypothetical protein
1616415	1628309	11894	SIGI-HMM		Gt21A_02818	1627034	1627285	1	hypothetical protein
1616415	1628309	11894	SIGI-HMM		Gt21A_02817	1627339	1628028	1	hypothetical protein
1616415	1628309	11894	SIGI-HMM		Gt21A_02816	1628058	1628309	1	hypothetical protein
1879509	1884116	4607	SIGI-HMM		Gt21A_02344	1879355	1879525	-1	hypothetical protein
1879509	1884116	4607	SIGI-HMM		Gt21A_02343	1879509	1879823	-1	hypothetical protein
1879509	1884116	4607	SIGI-HMM		Gt21A_02341	1880545	1881498	1	hypothetical protein
1879509	1884116	4607	SIGI-HMM		Gt21A_02340	1881503	1881682	-1	hypothetical protein
1879509	1884116	4607	SIGI-HMM		Gt21A_02339	1882282	1882719	-1	hypothetical protein
1879509	1884116	4607	SIGI-HMM		Gt21A_02338	1882784	1882951	-1	hypothetical protein
1879509	1884116	4607	SIGI-HMM		Gt21A_02337	1882944	1883072	-1	hypothetical protein
1879509	1884116	4607	SIGI-HMM		Gt21A_02336	1883069	1883485	-1	hypothetical protein
1879509	1884116	4607	SIGI-HMM		Gt21A_02335	1883482	1883919	-1	hypothetical protein
1879509	1884116	4607	SIGI-HMM		Gt21A_02334	1883949	1884116	-1	hypothetical protein
1887237	1894331	7094	SIGI-HMM		Gt21A_02325	1887237	1887449	-1	hypothetical protein
1887237	1894331	7094	SIGI-HMM		Gt21A_02324	1887452	1887706	-1	hypothetical protein
1887237	1894331	7094	SIGI-HMM		Gt21A_02323	1887850	1888110	-1	hypothetical protein
1887237	1894331	7094	SIGI-HMM		Gt21A_02322	1888244	1888453	-1	hypothetical protein
1887237	1894331	7094	SIGI-HMM		Gt21A_02321	1888736	1888945	1	hypothetical protein
1887237	1894331	7094	SIGI-HMM		Gt21A_02320	1888932	1889135	-1	hypothetical protein
1887237	1894331	7094	SIGI-HMM		Gt21A_02319	1889148	1889375	-1	hypothetical protein
1887237	1894331	7094	SIGI-HMM		Gt21A_02318	1889390	1890085	-1	hypothetical protein
1887237	1894331	7094	SIGI-HMM		Gt21A_02317	1890143	1890415	1	hypothetical protein
1887237	1894331	7094	SIGI-HMM		Gt21A_02316	1890474	1890674	-1	hypothetical protein
1887237	1894331	7094	SIGI-HMM		Gt21A_02315	1890690	1890923	-1	hypothetical protein
1887237	1894331	7094	SIGI-HMM	lexA_2	Gt21A_02314	1891091	1891795	1	LexA repressor
1887237	1894331	7094	SIGI-HMM		Gt21A_02313	1891919	1892332	1	hypothetical protein
1887237	1894331	7094	SIGI-HMM		Gt21A_02312	1892325	1892639	1	hypothetical protein
1887237	1894331	7094	SIGI-HMM		Gt21A_02311	1892636	1892740	-1	hypothetical protein
1887237	1894331	7094	SIGI-HMM		Gt21A_02310	1892807	1893037	1	hypothetical protein
1887237	1894331	7094	SIGI-HMM		Gt21A_02309	1893215	1893403	1	hypothetical protein
1887237	1894331	7094	SIGI-HMM		Gt21A_02307	1893567	1894331	1	hypothetical protein
2214487	2221058	6571	SIGI-HMM		Gt21A_01790	2214487	2214612	1	hypothetical protein
2214487	2221058	6571	SIGI-HMM	mscL_1	Gt21A_01791	2214773	2215150	1	Large-conductance mechanosensitive channel
2214487	2221058	6571	SIGI-HMM		Gt21A_01792	2215177	2215536	1	hypothetical protein
2214487	2221058	6571	SIGI-HMM	ycnE_1	Gt21A_01793	2215567	2215848	1	Putative monooxygenase YcnE
2214487	2221058	6571	SIGI-HMM		Gt21A_01796	2216175	2217302	1	hypothetical protein
2214487	2221058	6571	SIGI-HMM	xerC_3	Gt21A_01797	2217400	2218521	1	Tyrosine recombinase XerC
2214487	2221058	6571	SIGI-HMM		Gt21A_01799	2218873	2219079	-1	hypothetical protein
2214487	2221058	6571	SIGI-HMM		Gt21A_01801	2219540	2220256	1	hypothetical protein
2214487	2221058	6571	SIGI-HMM		Gt21A_01802	2220362	2220637	-1	hypothetical protein
2214487	2221058	6571	SIGI-HMM		Gt21A_01803	2220789	2221058	-1	hypothetical protein
2572372	2580218	7846	SIGI-HMM		Gt21A_02973	2572372	2572893	-1	hypothetical protein
2572372	2580218	7846	SIGI-HMM		Gt21A_02974	2572910	2573239	-1	hypothetical protein
2572372	2580218	7846	SIGI-HMM		Gt21A_02975	2573269	2574318	-1	hypothetical protein
2572372	2580218	7846	SIGI-HMM		Gt21A_02976	2574315	2574845	-1	hypothetical protein
2572372	2580218	7846	SIGI-HMM		Gt21A_02977	2574895	2576391	-1	Putative multidrug export ATP-binding/permease protein
2572372	2580218	7846	SIGI-HMM		Gt21A_02978	2577640	2578032	1	hypothetical protein
2572372	2580218	7846	SIGI-HMM		Gt21A_00738	2579475	2580218	-1	hypothetical protein
2922399	2927035	4636	SIGI-HMM		Gt21A_03206	2922399	2922638	-1	hypothetical protein
2922399	2927035	4636	SIGI-HMM		Gt21A_03207	2922635	2923297	-1	hypothetical protein
2922399	2927035	4636	SIGI-HMM		Gt21A_03208	2923380	2924294	-1	hypothetical protein
2922399	2927035	4636	SIGI-HMM		Gt21A_03209	2924700	2925137	-1	hypothetical protein
2922399	2927035	4636	SIGI-HMM		Gt21A_03210	2925251	2925370	-1	hypothetical protein
2922399	2927035	4636	SIGI-HMM		Gt21A_03211	2925363	2925491	-1	hypothetical protein
2922399	2927035	4636	SIGI-HMM		Gt21A_03212	2925488	2925943	-1	hypothetical protein
2922399	2927035	4636	SIGI-HMM		Gt21A_03213	2925940	2926326	-1	hypothetical protein
2922399	2927035	4636	SIGI-HMM		Gt21A_03214	2926319	2926495	-1	hypothetical protein
2922399	2927035	4636	SIGI-HMM		Gt21A_03215	2926525	2926692	-1	hypothetical protein
2922399	2927035	4636	SIGI-HMM		Gt21A_03216	2926695	2926868	-1	hypothetical protein
2922399	2927035	4636	SIGI-HMM		Gt21A_03217	2926886	2927035	-1	hypothetical protein
2932562	2936867	4305	SIGI-HMM		Gt21A_03232	2932562	2932765	-1	hypothetical protein
2932562	2936867	4305	SIGI-HMM		Gt21A_03233	2933023	2933442	1	hypothetical protein
2932562	2936867	4305	SIGI-HMM		Gt21A_03234	2933461	2933889	1	hypothetical protein
2932562	2936867	4305	SIGI-HMM	kcsA_2	Gt21A_03235	2933964	2934698	1	pH-gated potassium channel KcsA
2932562	2936867	4305	SIGI-HMM		Gt21A_03236	2934701	2934919	1	hypothetical protein
2932562	2936867	4305	SIGI-HMM		Gt21A_03237	2935093	2935239	1	hypothetical protein
2932562	2936867	4305	SIGI-HMM		Gt21A_03238	2935492	2935680	1	hypothetical protein
2932562	2936867	4305	SIGI-HMM		Gt21A_03239	2935811	2935987	1	hypothetical protein
2932562	2936867	4305	SIGI-HMM		Gt21A_03240	2936113	2936370	1	hypothetical protein
2932562	2936867	4305	SIGI-HMM		Gt21A_03241	2936553	2936867	1	hypothetical protein
3390170	3396416	6246	SIGI-HMM		Gt21A_03384	3390170	3390310	-1	hypothetical protein
3390170	3396416	6246	SIGI-HMM		Gt21A_03383	3390892	3391536	-1	hypothetical protein
3390170	3396416	6246	SIGI-HMM		Gt21A_03382	3391598	3391744	-1	hypothetical protein
3390170	3396416	6246	SIGI-HMM		Gt21A_03381	3393154	3393249	1	hypothetical protein
3390170	3396416	6246	SIGI-HMM		Gt21A_03380	3393467	3393709	-1	hypothetical protein
3390170	3396416	6246	SIGI-HMM		Gt21A_03379	3393716	3393835	-1	hypothetical protein
3390170	3396416	6246	SIGI-HMM		Gt21A_03378	3393905	3394213	-1	hypothetical protein
3390170	3396416	6246	SIGI-HMM	soj_2	Gt21A_03377	3394206	3395036	-1	Sporulation initiation inhibitor protein Soj
3390170	3396416	6246	SIGI-HMM		Gt21A_03376	3396057	3396416	1	hypothetical protein
3403061	3407517	4456	SIGI-HMM	xerC_6	Gt21A_03311	3403061	3404191	-1	Tyrosine recombinase XerC
3403061	3407517	4456	SIGI-HMM		Gt21A_03312	3404351	3404914	-1	hypothetical protein
3403061	3407517	4456	SIGI-HMM		Gt21A_03313	3405112	3405342	1	hypothetical protein
3403061	3407517	4456	SIGI-HMM		Gt21A_03314	3405563	3406123	-1	hypothetical protein
3403061	3407517	4456	SIGI-HMM		Gt21A_03315	3406216	3406647	-1	hypothetical protein
3403061	3407517	4456	SIGI-HMM		Gt21A_03316	3406657	3407037	-1	hypothetical protein
3403061	3407517	4456	SIGI-HMM		Gt21A_03317	3407329	3407517	1	hypothetical protein
3403061	3407517	4456	SIGI-HMM		Gt21A_03318	3407514	3407891	-1	hypothetical protein
3486209	3499760	13551	SIGI-HMM		Gt21A_03154	3486209	3487225	1	hypothetical protein
3486209	3499760	13551	SIGI-HMM		Gt21A_03155	3487246	3487476	1	hypothetical protein
3486209	3499760	13551	SIGI-HMM	mntH_4	Gt21A_03156	3488537	3489823	-1	Divalent metal cation transporter MntH
3486209	3499760	13551	SIGI-HMM		Gt21A_03157	3490508	3490681	1	hypothetical protein
3486209	3499760	13551	SIGI-HMM		Gt21A_03158	3491285	3492400	-1	Endoglucanase
3486209	3499760	13551	SIGI-HMM	pgaC_3	Gt21A_03159	3492420	3493730	-1	Poly-beta-1,6-N-acetyl-D-glucosamine synthase
3486209	3499760	13551	SIGI-HMM		Gt21A_03160	3493874	3494731	-1	hypothetical protein
3486209	3499760	13551	SIGI-HMM	proX	Gt21A_03452	3496139	3496621	1	Prolyl-tRNA editing protein ProX
3486209	3499760	13551	SIGI-HMM	mepA_3	Gt21A_03451	3496618	3497943	1	Multidrug export protein MepA
3486209	3499760	13551	SIGI-HMM		Gt21A_03450	3498301	3499257	-1	hypothetical protein
3486209	3499760	13551	SIGI-HMM		Gt21A_03449	3499317	3499760	-1	hypothetical protein
3503875	3507929	4054	SIGI-HMM	yedJ_2	Gt21A_03444	3503875	3504537	1	putative protein YedJ
3503875	3507929	4054	SIGI-HMM	ahcY	Gt21A_03443	3504527	3505681	1	Adenosylhomocysteinase
3503875	3507929	4054	SIGI-HMM		Gt21A_03442	3505876	3506613	-1	hypothetical protein
3503875	3507929	4054	SIGI-HMM		Gt21A_03441	3506967	3507929	1	hypothetical protein
3564039	3569098	5059	SIGI-HMM		Gt21A_03405	3564039	3564704	-1	hypothetical protein
3564039	3569098	5059	SIGI-HMM		Gt21A_03406	3566823	3567506	-1	hypothetical protein
3564039	3569098	5059	SIGI-HMM		Gt21A_03407	3567581	3568474	-1	hypothetical protein
3564039	3569098	5059	SIGI-HMM		Gt21A_03408	3568490	3569098	-1	hypothetical protein

## Sheet: B
B. GI of UTNGt2
Island start	Island end	Length	Method	Gene ID	Locus	Gene start	Gene end	Strand	Product
137940	153149	15209	IslandPath-DIMOB	misCA	Gt2_00158	137940	138773	-1	Membrane protein insertase MisCA
137940	153149	15209	IslandPath-DIMOB	rnpA	Gt2_00157	138789	139133	-1	Ribonuclease P protein component
137940	153149	15209	IslandPath-DIMOB	dnaA	Gt2_00156	139884	141251	1	Chromosomal replication initiator protein DnaA
137940	153149	15209	IslandPath-DIMOB	dnaN	Gt2_00155	141429	142568	1	Beta sliding clamp
137940	153149	15209	IslandPath-DIMOB		Gt2_00154	143093	143326	1	hypothetical protein
137940	153149	15209	IslandPath-DIMOB	recF	Gt2_00153	143327	144451	1	DNA replication and repair protein RecF
137940	153149	15209	IslandPath-DIMOB	gyrB	Gt2_00152	144448	146394	1	DNA gyrase subunit B
137940	153149	15209	IslandPath-DIMOB	gyrA	Gt2_00151	146559	149120	1	DNA gyrase subunit A
137940	153149	15209	IslandPath-DIMOB	rpsF	Gt2_00150	149743	150042	1	30S ribosomal protein S6
137940	153149	15209	IslandPath-DIMOB	ssbA	Gt2_00149	150079	150681	1	Single-stranded DNA-binding protein A
137940	153149	15209	IslandPath-DIMOB	rpsR	Gt2_00148	150720	150956	1	30S ribosomal protein S18
137940	153149	15209	IslandPath-DIMOB	gdpP	Gt2_00147	151137	153149	1	Cyclic-di-AMP phosphodiesterase GdpP
1140864	1183088	42224	IslandPath-DIMOB	iolU_3	Gt2_02328	1140864	1141871	1	scyllo-inositol 2-dehydrogenase (NADP(+)) IolU
1140864	1183088	42224	IslandPath-DIMOB	yfmL	Gt2_02329	1141884	1143218	1	putative ATP-dependent RNA helicase YfmL
1140864	1183088	42224	IslandPath-DIMOB	xerC_4	Gt2_02331	1143460	1144641	-1	Tyrosine recombinase XerC
1140864	1183088	42224	IslandPath-DIMOB		Gt2_02332	1144962	1145726	-1	hypothetical protein
1140864	1183088	42224	IslandPath-DIMOB		Gt2_02333	1145792	1146460	-1	hypothetical protein
1140864	1183088	42224	IslandPath-DIMOB		Gt2_02334	1146625	1147341	-1	hypothetical protein
1140864	1183088	42224	IslandPath-DIMOB		Gt2_02335	1147423	1147677	-1	hypothetical protein
1140864	1183088	42224	IslandPath-DIMOB	lexA_2	Gt2_02336	1147792	1148463	-1	LexA repressor
1140864	1183088	42224	IslandPath-DIMOB		Gt2_02337	1148656	1148871	1	hypothetical protein
1140864	1183088	42224	IslandPath-DIMOB		Gt2_02338	1148887	1149612	1	hypothetical protein
1140864	1183088	42224	IslandPath-DIMOB		Gt2_02339	1149633	1149893	1	hypothetical protein
1140864	1183088	42224	IslandPath-DIMOB		Gt2_02340	1150035	1150289	1	hypothetical protein
1140864	1183088	42224	IslandPath-DIMOB		Gt2_02341	1150292	1150540	1	hypothetical protein
1140864	1183088	42224	IslandPath-DIMOB		Gt2_02342	1150557	1150862	1	hypothetical protein
1140864	1183088	42224	IslandPath-DIMOB		Gt2_02343	1150957	1151736	1	hypothetical protein
1140864	1183088	42224	IslandPath-DIMOB	dnaC_3	Gt2_02344	1151736	1152521	1	DNA replication protein DnaC
1140864	1183088	42224	IslandPath-DIMOB		Gt2_02345	1152518	1152679	1	hypothetical protein
1140864	1183088	42224	IslandPath-DIMOB		Gt2_02346	1152657	1152965	1	hypothetical protein
1140864	1183088	42224	IslandPath-DIMOB		Gt2_02347	1153240	1153665	1	hypothetical protein
1140864	1183088	42224	IslandPath-DIMOB		Gt2_02348	1154853	1155026	1	hypothetical protein
1140864	1183088	42224	IslandPath-DIMOB		Gt2_02349	1155001	1155174	1	hypothetical protein
1140864	1183088	42224	IslandPath-DIMOB		Gt2_02350	1155155	1155391	1	hypothetical protein
1140864	1183088	42224	IslandPath-DIMOB		Gt2_02351	1155436	1155909	1	hypothetical protein
1140864	1183088	42224	IslandPath-DIMOB		Gt2_02352	1155906	1156163	1	hypothetical protein
1140864	1183088	42224	IslandPath-DIMOB		Gt2_02353	1156164	1156466	1	hypothetical protein
1140864	1183088	42224	IslandPath-DIMOB		Gt2_02354	1156468	1156698	1	hypothetical protein
1140864	1183088	42224	IslandPath-DIMOB		Gt2_02355	1156920	1157354	1	hypothetical protein
1140864	1183088	42224	IslandPath-DIMOB		Gt2_02356	1157338	1159257	1	hypothetical protein
1140864	1183088	42224	IslandPath-DIMOB		Gt2_02357	1159270	1159443	1	hypothetical protein
1140864	1183088	42224	IslandPath-DIMOB		Gt2_02358	1159479	1160597	1	hypothetical protein
1140864	1183088	42224	IslandPath-DIMOB		Gt2_02359	1160569	1161174	1	hypothetical protein
1140864	1183088	42224	IslandPath-DIMOB		Gt2_02360	1161181	1162563	1	hypothetical protein
1140864	1183088	42224	IslandPath-DIMOB		Gt2_02361	1162676	1162930	1	hypothetical protein
1140864	1183088	42224	IslandPath-DIMOB		Gt2_02362	1162931	1163278	1	hypothetical protein
1140864	1183088	42224	IslandPath-DIMOB		Gt2_02363	1163281	1163688	1	hypothetical protein
1140864	1183088	42224	IslandPath-DIMOB		Gt2_02364	1163688	1164068	1	hypothetical protein
1140864	1183088	42224	IslandPath-DIMOB		Gt2_02365	1164085	1164738	1	hypothetical protein
1140864	1183088	42224	IslandPath-DIMOB		Gt2_02366	1164815	1165189	1	hypothetical protein
1140864	1183088	42224	IslandPath-DIMOB		Gt2_02367	1165228	1165419	1	hypothetical protein
1140864	1183088	42224	IslandPath-DIMOB	yqbO	Gt2_02368	1165451	1170190	1	putative protein YqbO
1140864	1183088	42224	IslandPath-DIMOB		Gt2_02369	1170267	1172042	1	hypothetical protein
1140864	1183088	42224	IslandPath-DIMOB		Gt2_02370	1172108	1174522	1	hypothetical protein
1140864	1183088	42224	IslandPath-DIMOB		Gt2_02371	1174539	1177091	1	hypothetical protein
1140864	1183088	42224	IslandPath-DIMOB		Gt2_02372	1177084	1177335	1	hypothetical protein
1140864	1183088	42224	IslandPath-DIMOB		Gt2_02373	1177339	1177500	1	hypothetical protein
1140864	1183088	42224	IslandPath-DIMOB		Gt2_02374	1177484	1177990	1	hypothetical protein
1140864	1183088	42224	IslandPath-DIMOB		Gt2_02375	1177996	1178487	1	hypothetical protein
1140864	1183088	42224	IslandPath-DIMOB		Gt2_02376	1178499	1179518	1	hypothetical protein
1140864	1183088	42224	IslandPath-DIMOB		Gt2_02377	1179518	1179781	1	hypothetical protein
1140864	1183088	42224	IslandPath-DIMOB		Gt2_02378	1179793	1180326	1	hypothetical protein
1140864	1183088	42224	IslandPath-DIMOB		Gt2_02379	1180577	1180789	1	hypothetical protein
1140864	1183088	42224	IslandPath-DIMOB		Gt2_02380	1181207	1181647	-1	Putative universal stress protein
1140864	1183088	42224	IslandPath-DIMOB	chbC_2	Gt2_02381	1181781	1183088	1	PTS system N,N'-diacetylchitobiose-specific EIIC component
1140864	1183088	42224	IslandPath-DIMOB		Gt2_02382	1183081	1183947	1	hypothetical protein
1249855	1258292	8437	IslandPath-DIMOB		Gt2_02933	1249855	1250235	1	hypothetical protein
1249855	1258292	8437	IslandPath-DIMOB	dppE_2	Gt2_02934	1250782	1252425	1	Dipeptide-binding protein DppE
1249855	1258292	8437	IslandPath-DIMOB	oppB	Gt2_02935	1252583	1253512	1	Oligopeptide transport system permease protein OppB
1249855	1258292	8437	IslandPath-DIMOB	dppC	Gt2_02936	1253516	1254550	1	Dipeptide transport system permease protein DppC
1249855	1258292	8437	IslandPath-DIMOB	oppD	Gt2_02937	1254566	1255645	1	Oligopeptide transport ATP-binding protein OppD
1249855	1258292	8437	IslandPath-DIMOB	oppF	Gt2_02938	1255652	1256617	1	Oligopeptide transport ATP-binding protein OppF
1249855	1258292	8437	IslandPath-DIMOB		Gt2_02939	1257158	1257547	1	hypothetical protein
1249855	1258292	8437	IslandPath-DIMOB	xerH	Gt2_02940	1257732	1258292	1	Tyrosine recombinase XerH
1521621	1605449	83828	IslandPath-DIMOB	hhaIM	Gt2_02574	1521621	1522763	-1	Modification methylase HhaI
1521621	1605449	83828	IslandPath-DIMOB		Gt2_02575	1522919	1524160	1	hypothetical protein
1521621	1605449	83828	IslandPath-DIMOB		Gt2_02576	1524160	1526004	1	hypothetical protein
1521621	1605449	83828	IslandPath-DIMOB	smc_4	Gt2_02577	1526071	1528278	1	Chromosome partition protein Smc
1521621	1605449	83828	IslandPath-DIMOB		Gt2_02578	1528429	1528971	1	hypothetical protein
1521621	1605449	83828	IslandPath-DIMOB		Gt2_02579	1528989	1529789	1	hypothetical protein
1521621	1605449	83828	IslandPath-DIMOB		Gt2_02580	1529962	1530456	-1	hypothetical protein
1521621	1605449	83828	IslandPath-DIMOB		Gt2_02581	1530546	1531106	1	hypothetical protein
1521621	1605449	83828	IslandPath-DIMOB		Gt2_02582	1531277	1532452	1	hypothetical protein
1521621	1605449	83828	IslandPath-DIMOB	yggP	Gt2_02583	1532606	1533862	-1	Mannitol-1-phosphate 5-dehydrogenase
1521621	1605449	83828	IslandPath-DIMOB	sorC_3	Gt2_02584	1533990	1534955	-1	Sorbitol operon regulator
1521621	1605449	83828	IslandPath-DIMOB	bacC_5	Gt2_02585	1535149	1535946	1	Dihydroanticapsin 7-dehydrogenase
1521621	1605449	83828	IslandPath-DIMOB	sorA_2	Gt2_02586	1535969	1536388	1	PTS system sorbose-specific EIIA component
1521621	1605449	83828	IslandPath-DIMOB	sorB_2	Gt2_02587	1536388	1536879	1	PTS system sorbose-specific EIIB component
1521621	1605449	83828	IslandPath-DIMOB	sorC_4	Gt2_02588	1536896	1537708	1	PTS system sorbose-specific EIIC component
1521621	1605449	83828	IslandPath-DIMOB	sorD_2	Gt2_02589	1537722	1538558	1	PTS system sorbose-specific EIID component
1521621	1605449	83828	IslandPath-DIMOB		Gt2_02590	1538587	1538745	1	hypothetical protein
1521621	1605449	83828	IslandPath-DIMOB	gatB_3	Gt2_02591	1538793	1539080	-1	PTS system galactitol-specific EIIB component
1521621	1605449	83828	IslandPath-DIMOB		Gt2_02592	1539095	1540015	-1	hypothetical protein
1521621	1605449	83828	IslandPath-DIMOB		Gt2_02593	1540062	1540502	1	hypothetical protein
1521621	1605449	83828	IslandPath-DIMOB	pinR	Gt2_02594	1540748	1541329	1	Serine recombinase PinR
1521621	1605449	83828	IslandPath-DIMOB	fbp	Gt2_02595	1541805	1543712	1	Fructose-1,6-bisphosphatase class 3
1521621	1605449	83828	IslandPath-DIMOB		Gt2_02596	1545058	1545231	-1	hypothetical protein
1521621	1605449	83828	IslandPath-DIMOB		Gt2_02597	1545392	1545730	1	hypothetical protein
1521621	1605449	83828	IslandPath-DIMOB		Gt2_02598	1545727	1546263	1	hypothetical protein
1521621	1605449	83828	IslandPath-DIMOB	bin3_1	Gt2_02599	1547222	1547854	1	Putative transposon Tn552 DNA-invertase bin3
1521621	1605449	83828	IslandPath-DIMOB		Gt2_02600	1547941	1548843	1	hypothetical protein
1521621	1605449	83828	IslandPath-DIMOB		Gt2_02601	1549095	1550426	1	hypothetical protein
1521621	1605449	83828	IslandPath-DIMOB	psaA_2	Gt2_02602	1550601	1551512	-1	Manganese ABC transporter substrate-binding lipoprotein
1521621	1605449	83828	IslandPath-DIMOB	cwlC	Gt2_02603	1551566	1552417	-1	Sporulation-specific N-acetylmuramoyl-L-alanine amidase
1521621	1605449	83828	IslandPath-DIMOB		Gt2_02604	1552499	1552627	-1	hypothetical protein
1521621	1605449	83828	IslandPath-DIMOB	rpsN2_2	Gt2_02605	1552658	1552927	-1	Alternate 30S ribosomal protein S14
1521621	1605449	83828	IslandPath-DIMOB	rpmGA_2	Gt2_02606	1552949	1553098	-1	50S ribosomal protein L33 1
1521621	1605449	83828	IslandPath-DIMOB		Gt2_02607	1553121	1553423	-1	hypothetical protein
1521621	1605449	83828	IslandPath-DIMOB	rpmF	Gt2_02608	1553450	1553629	-1	50S ribosomal protein L32
1521621	1605449	83828	IslandPath-DIMOB	serP1	Gt2_02609	1554315	1555706	-1	Serine permease SerP1
1521621	1605449	83828	IslandPath-DIMOB		Gt2_02610	1557738	1557890	-1	hypothetical protein
1521621	1605449	83828	IslandPath-DIMOB		Gt2_02611	1558770	1559201	-1	Putative universal stress protein
1521621	1605449	83828	IslandPath-DIMOB	mntH_4	Gt2_02612	1559201	1560793	-1	Divalent metal cation transporter MntH
1521621	1605449	83828	IslandPath-DIMOB	ideR_2	Gt2_02613	1560917	1561570	1	Iron-dependent repressor IdeR
1521621	1605449	83828	IslandPath-DIMOB		Gt2_02614	1561655	1561783	1	hypothetical protein
1521621	1605449	83828	IslandPath-DIMOB		Gt2_02615	1562072	1562353	-1	hypothetical protein
1521621	1605449	83828	IslandPath-DIMOB		Gt2_02616	1562873	1563208	-1	hypothetical protein
1521621	1605449	83828	IslandPath-DIMOB	ligA_2	Gt2_02617	1563323	1563607	1	DNA ligase
1521621	1605449	83828	IslandPath-DIMOB		Gt2_02618	1563790	1566504	1	hypothetical protein
1521621	1605449	83828	IslandPath-DIMOB		Gt2_02619	1566631	1566849	1	hypothetical protein
1521621	1605449	83828	IslandPath-DIMOB		Gt2_02620	1566850	1568661	1	hypothetical protein
1521621	1605449	83828	IslandPath-DIMOB		Gt2_02621	1568728	1569066	1	hypothetical protein
1521621	1605449	83828	IslandPath-DIMOB		Gt2_02622	1569129	1569527	-1	hypothetical protein
1521621	1605449	83828	IslandPath-DIMOB		Gt2_02623	1569520	1569840	-1	hypothetical protein
1521621	1605449	83828	IslandPath-DIMOB	umuC	Gt2_02624	1569833	1571134	-1	Protein UmuC
1521621	1605449	83828	IslandPath-DIMOB		Gt2_02625	1571248	1571559	1	hypothetical protein
1521621	1605449	83828	IslandPath-DIMOB		Gt2_02626	1571797	1572066	-1	hypothetical protein
1521621	1605449	83828	IslandPath-DIMOB	soj_2	Gt2_02627	1572053	1572955	-1	Sporulation initiation inhibitor protein Soj
1521621	1605449	83828	IslandPath-DIMOB		Gt2_02628	1573809	1575341	1	hypothetical protein
1521621	1605449	83828	IslandPath-DIMOB		Gt2_02629	1575651	1578218	1	hypothetical protein
1521621	1605449	83828	IslandPath-DIMOB		Gt2_02630	1578482	1578865	1	hypothetical protein
1521621	1605449	83828	IslandPath-DIMOB		Gt2_02631	1578837	1579496	1	hypothetical protein
1521621	1605449	83828	IslandPath-DIMOB		Gt2_02632	1579513	1581465	1	hypothetical protein
1521621	1605449	83828	IslandPath-DIMOB		Gt2_02633	1581468	1581674	1	hypothetical protein
1521621	1605449	83828	IslandPath-DIMOB		Gt2_02634	1581675	1582838	1	hypothetical protein
1521621	1605449	83828	IslandPath-DIMOB		Gt2_02635	1582851	1583480	1	hypothetical protein
1521621	1605449	83828	IslandPath-DIMOB		Gt2_02636	1584297	1585259	1	hypothetical protein
1521621	1605449	83828	IslandPath-DIMOB		Gt2_02637	1585256	1585471	1	hypothetical protein
1521621	1605449	83828	IslandPath-DIMOB		Gt2_02638	1585473	1585691	1	hypothetical protein
1521621	1605449	83828	IslandPath-DIMOB		Gt2_02639	1585688	1585987	1	hypothetical protein
1521621	1605449	83828	IslandPath-DIMOB		Gt2_02640	1585984	1586409	1	hypothetical protein
1521621	1605449	83828	IslandPath-DIMOB		Gt2_02641	1586428	1587336	1	hypothetical protein
1521621	1605449	83828	IslandPath-DIMOB		Gt2_02642	1587651	1587941	1	hypothetical protein
1521621	1605449	83828	IslandPath-DIMOB		Gt2_02643	1587943	1588443	1	hypothetical protein
1521621	1605449	83828	IslandPath-DIMOB		Gt2_02644	1588461	1588928	1	hypothetical protein
1521621	1605449	83828	IslandPath-DIMOB		Gt2_02645	1588900	1591089	1	hypothetical protein
1521621	1605449	83828	IslandPath-DIMOB		Gt2_02646	1591091	1591726	1	hypothetical protein
1521621	1605449	83828	IslandPath-DIMOB		Gt2_02647	1592370	1592624	1	hypothetical protein
1521621	1605449	83828	IslandPath-DIMOB	topB	Gt2_02648	1593213	1595366	1	DNA topoisomerase 3
1521621	1605449	83828	IslandPath-DIMOB		Gt2_02649	1595505	1596470	1	hypothetical protein
1521621	1605449	83828	IslandPath-DIMOB		Gt2_02650	1596467	1596661	1	hypothetical protein
1521621	1605449	83828	IslandPath-DIMOB		Gt2_02651	1596664	1597269	1	hypothetical protein
1521621	1605449	83828	IslandPath-DIMOB	clpE_1	Gt2_02652	1597272	1599056	1	ATP-dependent Clp protease ATP-binding subunit ClpE
1521621	1605449	83828	IslandPath-DIMOB		Gt2_02653	1599123	1599437	1	hypothetical protein
1521621	1605449	83828	IslandPath-DIMOB		Gt2_02654	1599533	1601635	1	hypothetical protein
1521621	1605449	83828	IslandPath-DIMOB		Gt2_02655	1601645	1602433	1	hypothetical protein
1521621	1605449	83828	IslandPath-DIMOB	spaP	Gt2_02656	1602462	1605449	1	Cell surface antigen I/II
2040902	2083269	42367	IslandPath-DIMOB		Gt2_01204	2040902	2042644	-1	hypothetical protein
2040902	2083269	42367	IslandPath-DIMOB	rodA_1	Gt2_01205	2043123	2044334	-1	Peptidoglycan glycosyltransferase RodA
2040902	2083269	42367	IslandPath-DIMOB		Gt2_01207	2045574	2046104	-1	hypothetical protein
2040902	2083269	42367	IslandPath-DIMOB		Gt2_01208	2046117	2046380	-1	hypothetical protein
2040902	2083269	42367	IslandPath-DIMOB		Gt2_01209	2046380	2047552	-1	hypothetical protein
2040902	2083269	42367	IslandPath-DIMOB		Gt2_01210	2047564	2047923	-1	hypothetical protein
2040902	2083269	42367	IslandPath-DIMOB		Gt2_01211	2047907	2048068	-1	hypothetical protein
2040902	2083269	42367	IslandPath-DIMOB		Gt2_01212	2048072	2048323	-1	hypothetical protein
2040902	2083269	42367	IslandPath-DIMOB		Gt2_01213	2048316	2050862	-1	hypothetical protein
2040902	2083269	42367	IslandPath-DIMOB		Gt2_01214	2050879	2053293	-1	hypothetical protein
2040902	2083269	42367	IslandPath-DIMOB		Gt2_01215	2053362	2055134	-1	hypothetical protein
2040902	2083269	42367	IslandPath-DIMOB	iap_1	Gt2_01216	2055209	2060239	-1	putative endopeptidase p60
2040902	2083269	42367	IslandPath-DIMOB		Gt2_01217	2060271	2060462	-1	hypothetical protein
2040902	2083269	42367	IslandPath-DIMOB		Gt2_01218	2060501	2060875	-1	hypothetical protein
2040902	2083269	42367	IslandPath-DIMOB		Gt2_01219	2060952	2061605	-1	hypothetical protein
2040902	2083269	42367	IslandPath-DIMOB		Gt2_01220	2061621	2062001	-1	hypothetical protein
2040902	2083269	42367	IslandPath-DIMOB		Gt2_01221	2062001	2062408	-1	hypothetical protein
2040902	2083269	42367	IslandPath-DIMOB		Gt2_01222	2062411	2062758	-1	hypothetical protein
2040902	2083269	42367	IslandPath-DIMOB		Gt2_01223	2062748	2063080	-1	hypothetical protein
2040902	2083269	42367	IslandPath-DIMOB		Gt2_01224	2063153	2064385	-1	hypothetical protein
2040902	2083269	42367	IslandPath-DIMOB	clpP1	Gt2_01225	2064385	2065143	-1	ATP-dependent Clp protease proteolytic subunit 1
2040902	2083269	42367	IslandPath-DIMOB		Gt2_01226	2065118	2066311	-1	hypothetical protein
2040902	2083269	42367	IslandPath-DIMOB		Gt2_01227	2066314	2066508	-1	hypothetical protein
2040902	2083269	42367	IslandPath-DIMOB		Gt2_01228	2066498	2068396	-1	hypothetical protein
2040902	2083269	42367	IslandPath-DIMOB		Gt2_01229	2068406	2068861	-1	hypothetical protein
2040902	2083269	42367	IslandPath-DIMOB		Gt2_01230	2069051	2069302	-1	hypothetical protein
2040902	2083269	42367	IslandPath-DIMOB		Gt2_01231	2069320	2069589	-1	hypothetical protein
2040902	2083269	42367	IslandPath-DIMOB		Gt2_01232	2069595	2070107	-1	hypothetical protein
2040902	2083269	42367	IslandPath-DIMOB		Gt2_01233	2070076	2070246	-1	hypothetical protein
2040902	2083269	42367	IslandPath-DIMOB		Gt2_01234	2070406	2071194	-1	hypothetical protein
2040902	2083269	42367	IslandPath-DIMOB		Gt2_01235	2071888	2072358	-1	hypothetical protein
2040902	2083269	42367	IslandPath-DIMOB		Gt2_01236	2072591	2072899	-1	hypothetical protein
2040902	2083269	42367	IslandPath-DIMOB		Gt2_01237	2072877	2073038	-1	hypothetical protein
2040902	2083269	42367	IslandPath-DIMOB	dnaC_2	Gt2_01238	2073035	2073820	-1	DNA replication protein DnaC
2040902	2083269	42367	IslandPath-DIMOB		Gt2_01239	2073820	2074617	-1	hypothetical protein
2040902	2083269	42367	IslandPath-DIMOB		Gt2_01240	2074719	2074976	-1	hypothetical protein
2040902	2083269	42367	IslandPath-DIMOB		Gt2_01241	2074976	2075146	-1	hypothetical protein
2040902	2083269	42367	IslandPath-DIMOB		Gt2_01242	2075268	2075420	-1	hypothetical protein
2040902	2083269	42367	IslandPath-DIMOB		Gt2_01243	2075432	2075632	-1	hypothetical protein
2040902	2083269	42367	IslandPath-DIMOB		Gt2_01244	2075635	2075883	-1	hypothetical protein
2040902	2083269	42367	IslandPath-DIMOB		Gt2_01245	2075896	2076099	-1	hypothetical protein
2040902	2083269	42367	IslandPath-DIMOB		Gt2_01246	2076265	2076555	1	hypothetical protein
2040902	2083269	42367	IslandPath-DIMOB		Gt2_01247	2077149	2077409	-1	hypothetical protein
2040902	2083269	42367	IslandPath-DIMOB		Gt2_01248	2077467	2077823	1	hypothetical protein
2040902	2083269	42367	IslandPath-DIMOB		Gt2_01249	2077820	2078023	-1	hypothetical protein
2040902	2083269	42367	IslandPath-DIMOB		Gt2_01250	2078034	2078786	-1	hypothetical protein
2040902	2083269	42367	IslandPath-DIMOB		Gt2_01251	2078799	2079014	-1	hypothetical protein
2040902	2083269	42367	IslandPath-DIMOB	sinR	Gt2_01252	2079270	2079596	1	HTH-type transcriptional regulator SinR
2040902	2083269	42367	IslandPath-DIMOB		Gt2_01253	2079603	2080016	1	hypothetical protein
2040902	2083269	42367	IslandPath-DIMOB		Gt2_01254	2080079	2080957	1	hypothetical protein
2040902	2083269	42367	IslandPath-DIMOB		Gt2_01255	2080972	2081172	1	hypothetical protein
2040902	2083269	42367	IslandPath-DIMOB		Gt2_01256	2081208	2081327	1	hypothetical protein
2040902	2083269	42367	IslandPath-DIMOB		Gt2_01258	2081493	2081723	1	hypothetical protein
2040902	2083269	42367	IslandPath-DIMOB		Gt2_01259	2081893	2082081	1	hypothetical protein
2040902	2083269	42367	IslandPath-DIMOB		Gt2_01260	2082212	2082388	1	hypothetical protein
2040902	2083269	42367	IslandPath-DIMOB		Gt2_01261	2082514	2082771	1	hypothetical protein
2040902	2083269	42367	IslandPath-DIMOB		Gt2_01262	2082955	2083269	1	hypothetical protein
502643	507381	4738	SIGI-HMM		Gt2_02115	502643	502765	1	hypothetical protein
502643	507381	4738	SIGI-HMM		Gt2_02114	502783	503169	1	hypothetical protein
502643	507381	4738	SIGI-HMM		Gt2_02113	503619	503810	1	hypothetical protein
502643	507381	4738	SIGI-HMM		Gt2_02112	504202	504447	1	hypothetical protein
502643	507381	4738	SIGI-HMM		Gt2_02111	504738	504893	1	hypothetical protein
502643	507381	4738	SIGI-HMM		Gt2_02110	505022	505441	1	hypothetical protein
502643	507381	4738	SIGI-HMM		Gt2_03031	506989	507381	1	hypothetical protein
1204744	1212996	8252	SIGI-HMM		Gt2_03076	1203651	1204754	-1	hypothetical protein
1204744	1212996	8252	SIGI-HMM	wzc	Gt2_03077	1204744	1205328	-1	Tyrosine-protein kinase wzc
1204744	1212996	8252	SIGI-HMM		Gt2_03078	1205346	1205993	-1	hypothetical protein
1204744	1212996	8252	SIGI-HMM	tmk_2	Gt2_03079	1205983	1206660	-1	Thymidylate kinase
1204744	1212996	8252	SIGI-HMM		Gt2_03080	1206683	1208200	-1	hypothetical protein
1204744	1212996	8252	SIGI-HMM	mshA	Gt2_03081	1208193	1209272	-1	D-inositol-3-phosphate glycosyltransferase
1204744	1212996	8252	SIGI-HMM		Gt2_03082	1209262	1210209	-1	hypothetical protein
1204744	1212996	8252	SIGI-HMM		Gt2_03083	1210225	1211325	-1	hypothetical protein
1204744	1212996	8252	SIGI-HMM		Gt2_03084	1211381	1212220	-1	hypothetical protein
1204744	1212996	8252	SIGI-HMM	wbbL	Gt2_03085	1212214	1212996	-1	N-acetylglucosaminyl-diphospho-decaprenol L-rhamnosyltransferase
1526071	1531106	5035	SIGI-HMM	smc_4	Gt2_02577	1526071	1528278	1	Chromosome partition protein Smc
1526071	1531106	5035	SIGI-HMM		Gt2_02578	1528429	1528971	1	hypothetical protein
1526071	1531106	5035	SIGI-HMM		Gt2_02579	1528989	1529789	1	hypothetical protein
1526071	1531106	5035	SIGI-HMM		Gt2_02580	1529962	1530456	-1	hypothetical protein
1526071	1531106	5035	SIGI-HMM		Gt2_02581	1530546	1531106	1	hypothetical protein
1549095	1553629	4534	SIGI-HMM		Gt2_02601	1549095	1550426	1	hypothetical protein
1549095	1553629	4534	SIGI-HMM	psaA_2	Gt2_02602	1550601	1551512	-1	Manganese ABC transporter substrate-binding lipoprotein
1549095	1553629	4534	SIGI-HMM	cwlC	Gt2_02603	1551566	1552417	-1	Sporulation-specific N-acetylmuramoyl-L-alanine amidase
1549095	1553629	4534	SIGI-HMM		Gt2_02604	1552499	1552627	-1	hypothetical protein
1549095	1553629	4534	SIGI-HMM	rpsN2_2	Gt2_02605	1552658	1552927	-1	Alternate 30S ribosomal protein S14
1549095	1553629	4534	SIGI-HMM	rpmGA_2	Gt2_02606	1552949	1553098	-1	50S ribosomal protein L33 1
1549095	1553629	4534	SIGI-HMM		Gt2_02607	1553121	1553423	-1	hypothetical protein
1549095	1553629	4534	SIGI-HMM	rpmF	Gt2_02608	1553450	1553629	-1	50S ribosomal protein L32
