# Supplementary material for: Decoding the Gene Variants of Two Native Probiotic Lactiplantibacillus plantarum Strains through Whole-Genome Resequencing: Insights into Bacterial Adaptability to Stressors and Antimicrobial Strength
Source: Genes (Basel). 2022 Feb 28;13(3):443. doi: 10.3390/genes13030443 (PMC8953754; doi:10.3390/genes13030443)
Supplement: Supplementary file 1 [file genes-13-00443-s001.zip › Table S3.xlsx]

## Sheet: Sheet1
	Table S3. Variant annotation results of putative plantaricin genes of native L. plantarum UTNGt21A and UTNGt2 strains
	Gene annotation (locus tag in WCFS1)	Gene product	Library name
			Representtive Transcript (annotation_type ; Gene_name ; codon_change ; protein_change ; cDNA_position/cDNA_lenght ; CDS_position/CDS_lenght ; Protein_position/Protein_lenght)
			UTNGt21A	UTNGt2
	plnA (lp_0415)	Bacteriocin plantaricin A	downstream_gene_variant ; plnA ; c.*3205A>T ; . ; . ; . ; . ; downstream_gene_variant ; plnA ; c.*3209_*3210insC ; . ; . ; . ; . ; downstream_gene_variant ; plnA ; c.*3243G>A ; . ; . ; . ; . ; downstream_gene_variant ; plnA ; c.*3266A>G ; . ; . ; . ; . ; downstream_gene_variant ; plnA ; c.*3282A>G ; . ; . ; . ; . ; downstream_gene_variant ; plnA ; c.*3310A>G ; . ; . ; . ; . ; downstream_gene_vari…	upstream_gene_variant ; plnA ; c.-267A>T ; . ; . ; . ; . ; upstream_gene_variant ; plnA ; c.-262_-261insA ; . ; . ; . ; . ; upstream_gene_variant ; plnA ; c.-248A>G ; . ; . ; . ; . ; upstream_gene_variant ; plnA ; c.-220T>G ; . ; . ; . ; . ; upstream_gene_variant ; plnA ; c.-209A>G ; . ; . ; . ; . ; upstream_gene_variant ; plnA ; c.-207A>G ; . ; . ; . ; . ; upstream_gene_variant ; plnA ; c.-157T>…
	plnB (lp_0416)	Two-component system histidine protein kinase PlnB sensor protein	synonymous_variant ; plnB ; c.741A>T ; p.Leu247Leu ; 741/1329 ; 741/1329 ; 247/442 ; synonymous_variant ; plnB ; c.744A>G ; p.Glu248Glu ; 744/1329 ; 744/1329 ; 248/442 ; synonymous_variant ; plnB ; c.745T>C ; p.Leu249Leu ; 745/1329 ; 745/1329 ; 249/442 ; synonymous_variant ; plnB ; c.753A>G ; p.Lys251Lys ; 753/1329 ; 753/1329 ; 251/442 ; synonymous_variant ; plnB ; c.759A>G ; p.Lys253Lys ; 759/13…	missense_variant ; plnB ; c.95A>G ; p.Asn32Ser ; 95/1329 ; 95/1329 ; 32/442 ; missense_variant ; plnB ; c.105A>T ; p.Arg35Ser ; 105/1329 ; 105/1329 ; 35/442 ; synonymous_variant ; plnB ; c.181T>C ; p.Leu61Leu ; 181/1329 ; 181/1329 ; 61/442 ; synonymous_variant ; plnB ; c.256T>C ; p.Leu86Leu ; 256/1329 ; 256/1329 ; 86/442 ; missense_variant ; plnB ; c.402T>G ; p.Ile134Met ; 402/1329 ; 402/1329 ; 1…
	plnC (lp_0417)	Two-component response regulator PlnC,activator	upstream_gene_variant ; plnC ; c.-589A>T ; . ; . ; . ; . ; upstream_gene_variant ; plnC ; c.-586A>G ; . ; . ; . ; . ; upstream_gene_variant ; plnC ; c.-585T>C ; . ; . ; . ; . ; upstream_gene_variant ; plnC ; c.-577A>G ; . ; . ; . ; . ; upstream_gene_variant ; plnC ; c.-571A>G ; . ; . ; . ; . ; upstream_gene_variant ; plnC ; c.-274C>G ; . ; . ; . ; . ;	missense_variant ; plnC ; c.34G>A ; p.Ala12Thr ; 34/744 ; 34/744 ; 12/247 ; synonymous_variant ; plnC ; c.36C>T ; p.Ala12Ala ; 36/744 ; 36/744 ; 12/247 ; missense_variant ; plnC ; c.53T>A ; p.Ile18Lys ; 53/744 ; 53/744 ; 18/247 ; synonymous_variant ; plnC ; c.117A>G ; p.Gly39Gly ; 117/744 ; 117/744 ; 39/247 ; missense_variant ; plnC ; c.126A>C ; p.Gln42His ; 126/744 ; 126/744 ; 42/247 ; missense_…
	plnD (lp_0418)	Two-component response regulator PlnD,repressor	missense_variant ; plnD ; c.31G>A ; p.Ala11Thr ; 31/744 ; 31/744 ; 11/247 ; missense_variant ; plnD ; c.70A>G ; p.Thr24Ala ; 70/744 ; 70/744 ; 24/247 ; missense_variant ; plnD ; c.202A>T ; p.Thr68Ser ; 202/744 ; 202/744 ; 68/247 ; synonymous_variant ; plnD ; c.507T>A ; p.Arg169Arg ; 507/744 ; 507/744 ; 169/247 ; synonymous_variant ; plnD ; c.612C>T ; p.Ser204Ser ; 612/744 ; 612/744 ; 204/247 ; sy…	missense_variant ; plnD ; c.35A>C ; p.Glu12Ala ; 35/744 ; 35/744 ; 12/247 ; missense_variant ; plnD ; c.202A>G ; p.Thr68Ala ; 202/744 ; 202/744 ; 68/247 ; missense_variant ; plnD ; c.340T>C ; p.Ser114Pro ; 340/744 ; 340/744 ; 114/247 ; synonymous_variant ; plnD ; c.348C>T ; p.Asp116Asp ; 348/744 ; 348/744 ; 116/247 ; missense_variant ; plnD ; c.481A>G ; p.Ile161Val ; 481/744 ; 481/744 ; 161/247 ;…
	plnE (lp_0422)	Bacteriocin peptide PlnE	synonymous_variant ; plnE ; c.96C>T ; p.Gly32Gly ; 96/171 ; 96/171 ; 32/56 ;	synonymous_variant ; plnE ; c.96C>T ; p.Gly32Gly ; 96/171 ; 96/171 ; 32/56 ;
	plnF (lp_0421)	Bacteriocin peptide PlnF	upstream_gene_variant ; plnI ; c.-275_-274insG ; . ; . ; . ; . ;	upstream_gene_variant ; plnF ; c.-267T>C ; . ; . ; . ; . ;
	plnI (lp_0419)	Bacteriocin immunity protein PlnI, membrane-bound protease CAAX family	synonymous_variant ; plnI ; c.666G>A ; p.Lys222Lys ; 666/774 ; 666/774 ; 222/257 ; synonymous_variant ; plnI ; c.636C>T ; p.Pro212Pro ; 636/774 ; 636/774 ; 212/257 ; synonymous_variant ; plnI ; c.597T>C ; p.Ser199Ser ; 597/774 ; 597/774 ; 199/257 ; synonymous_variant ; plnI ; c.555C>T ; p.Ser185Ser ; 555/774 ; 555/774 ; 185/257 ; synonymous_variant ; plnI ; c.495G>A ; p.Gln165Gln ; 495/774 ; 495/…	missense_variant ; plnI ; c.212A>G ; p.Lys71Arg ; 212/774 ; 212/774 ; 71/257 ; upstream_gene_variant ; plnI ; c.-10A>G ; . ; . ; . ; . ; conservative_inframe_insertion&splice_region_variant ; plnF ; c.159_*1insTTC ; . ; 159/159 ; 159/159 ; 53/52 ;
	plnG (lp_0423)	Bacteriocin ABC-transporter, ATP-binding and permease protein PlnG	synonymous_variant ; plnG ; c.273T>C ; p.Asp91Asp ; 273/2151 ; 273/2151 ; 91/716 ; synonymous_variant ; plnG ; c.312G>A ; p.Thr104Thr ; 312/2151 ; 312/2151 ; 104/716 ; missense_variant ; plnG ; c.620C>G ; p.Ala207Gly ; 620/2151 ; 620/2151 ; 207/716 ; synonymous_variant ; plnG ; c.1140A>G ; p.Leu380Leu ; 1140/2151 ; 1140/2151 ; 380/716 ; synonymous_variant ; plnG ; c.1626T>C ; p.Asn542Asn ; 1626/2…	missense_variant ; plnG ; c.179G>A ; p.Gly60Asp ; 179/2151 ; 179/2151 ; 60/716 ; synonymous_variant ; plnG ; c.312G>A ; p.Thr104Thr ; 312/2151 ; 312/2151 ; 104/716 ; synonymous_variant ; plnG ; c.1140A>G ; p.Leu380Leu ; 1140/2151 ; 1140/2151 ; 380/716 ; synonymous_variant ; plnG ; c.1626T>C ; p.Asn542Asn ; 1626/2151 ; 1626/2151 ; 542/716 ; synonymous_variant ; plnG ; c.1977T>C ; p.Ile659Ile ; 197…
	plnR(lp_0403)	Plantaricin biosynthesis protein PlnR	missense_variant ; plnR ; c.139G>A ; p.Ala47Thr ; 139/153 ; 139/153 ; 47/50 ; synonymous_variant ; plnR ; c.126G>T ; p.Gly42Gly ; 126/153 ; 126/153 ; 42/50 ; synonymous_variant ; plnR ; c.114A>G ; p.Ser38Ser ; 114/153 ; 114/153 ; 38/50 ; synonymous_variant ; plnR ; c.111C>T ; p.Ser37Ser ; 111/153 ; 111/153 ; 37/50 ; synonymous_variant ; plnR ; c.84T>C ; p.Tyr28Tyr ; 84/153 ; 84/153 ; 28/50 ; syno…	synonymous_variant ; plnR ; c.69C>A ; p.Val23Val ; 69/153 ; 69/153 ; 23/50 ; missense_variant ; plnR ; c.59C>T ; p.Ala20Val ; 59/153 ; 59/153 ; 20/50 ; synonymous_variant ; plnR ; c.24A>C ; p.Ile8Ile ; 24/153 ; 24/153 ; 8/50 ;
	plnL (lp_0404)	Bacteriocin immunity protein PlnL	synonymous_variant ; plnL ; c.657C>T ; p.Gly219Gly ; 657/669 ; 657/669 ; 219/222 ; synonymous_variant ; plnL ; c.546T>C ; p.Pro182Pro ; 546/669 ; 546/669 ; 182/222 ; synonymous_variant ; plnL ; c.508C>T ; p.Leu170Leu ; 508/669 ; 508/669 ; 170/222 ; synonymous_variant ; plnL ; c.504G>A ; p.Ala168Ala ; 504/669 ; 504/669 ; 168/222 ; synonymous_variant ; plnL ; c.489G>A ; p.Gly163Gly ; 489/669 ; 489/…	synonymous_variant ; plnL ; c.597C>A ; p.Ala199Ala ; 597/669 ; 597/669 ; 199/222 ; synonymous_variant ; plnL ; c.570T>C ; p.Tyr190Tyr ; 570/669 ; 570/669 ; 190/222 ; synonymous_variant ; plnL ; c.546T>C ; p.Pro182Pro ; 546/669 ; 546/669 ; 182/222 ; missense_variant ; plnL ; c.538A>C ; p.Ile180Leu ; 538/669 ; 538/669 ; 180/222 ; synonymous_variant ; plnL ; c.508C>T ; p.Leu170Leu ; 508/669 ; 508/66…
	plnK (lp_0405)	Putative bacteriocin peptide plnK	missense_variant ; plnK ; c.170A>G ; p.Lys57Arg ; 170/174 ; 170/174 ; 57/57 ; synonymous_variant ; plnK ; c.84T>C ; p.Ser28Ser ; 84/174 ; 84/174 ; 28/57 ; missense_variant ; plnK ; c.80G>C ; p.Arg27Pro ; 80/174 ; 80/174 ; 27/57 ; missense_variant ; plnK ; c.73A>G ; p.Asn25Asp ; 73/174 ; 73/174 ; 25/57 ; synonymous_variant ; plnK ; c.9T>C ; p.Ile3Ile ; 9/174 ; 9/174 ; 3/57 ; missense_variant ; pln…	missense_variant ; plnK ; c.170A>G ; p.Lys57Arg ; 170/174 ; 170/174 ; 57/57 ;
	plnJ (lp_0406)	Bacteriocin peptide plnJ	frameshift_variant ; plnJ ; c.154_155insC ; p.Ile53fs ; 154/168 ; 154/168 ; 52/55 ; missense_variant ; plnJ ; c.92G>A ; p.Gly31Asp ; 92/168 ; 92/168 ; 31/55 ; synonymous_variant ; plnJ ; c.60T>C ; p.Ser20Ser ; 60/168 ; 60/168 ; 20/55 ; synonymous_variant ; plnJ ; c.51A>G ; p.Ala17Ala ; 51/168 ; 51/168 ; 17/55 ; missense_variant ; plnJ ; c.47T>C ; p.Phe16Ser ; 47/168 ; 47/168 ; 16/55 ; synonymous_…	missense_variant ; plnJ ; c.137A>C ; p.Asp46Ala ; 137/168 ; 137/168 ; 46/55 ; missense_variant ; plnJ ; c.94G>T ; p.Ala32Ser ; 94/168 ; 94/168 ; 32/55 ; synonymous_variant ; plnJ ; c.78G>C ; p.Gly26Gly ; 78/168 ; 78/168 ; 26/55 ; synonymous_variant ; plnJ ; c.75C>T ; p.Asn25Asn ; 75/168 ; 75/168 ; 25/55 ; synonymous_variant ; plnJ ; c.69G>A ; p.Lys23Lys ; 69/168 ; 69/168 ; 23/55 ; synonymous_vari…
	plnQ (lp_0413)	Plantaricin biosynthesis protein PlnQ	upstream_gene_variant ; plnQ ; c.-350A>G ; . ; . ; . ; . ; upstream_gene_variant ; plnQ ; c.-348G>A ; . ; . ; . ; . ; upstream_gene_variant ; plnQ ; c.-344G>A ; . ; . ; . ; . ; upstream_gene_variant ; plnQ ; c.-342C>A ; . ; . ; . ; . ; upstream_gene_variant ; plnQ ; c.-337A>C ; . ; . ; . ; . ; upstream_gene_variant ; plnQ ; c.-336A>T ; . ; . ; . ; . ; upstream_gene_variant ; plnQ ; c.-323T>G ; . …	missense_variant ; plnQ ; c.10T>A ; p.Tyr4Asn ; 10/189 ; 10/189 ; 4/62 ; synonymous_variant ; plnQ ; c.22T>C ; p.Leu8Leu ; 22/189 ; 22/189 ; 8/62 ; missense_variant ; plnQ ; c.43G>A ; p.Ala15Thr ; 43/189 ; 43/189 ; 15/62 ; synonymous_variant ; plnQ ; c.123C>T ; p.Ser41Ser ; 123/189 ; 123/189 ; 41/62 ; missense_variant ; plnQ ; c.182G>A ; p.Arg61Lys ; 182/189 ; 182/189 ; 61/62 ;
	plnM (lp_0409)	Bacteriocin immunity protein PlnM	synonymous_variant ; plnM ; c.12A>G ; p.Arg4Arg ; 12/201 ; 12/201 ; 4/66 ; missense_variant ; plnM ; c.167C>T ; p.Ala56Val ; 167/201 ; 167/201 ; 56/66 ;	upstream_gene_variant ; plnM ; c.-2078C>G ; . ; . ; . ; . ; upstream_gene_variant ; plnM ; c.-2077C>T ; . ; . ; . ; . ;
	plnO (lp_0411)	Glycosyltransferase, group 2 family protein	missense_variant ; plnO ; c.115C>T ; p.Arg39Trp ; 115/1200 ; 115/1200 ; 39/399 ; synonymous_variant ; plnO ; c.288T>C ; p.Thr96Thr ; 288/1200 ; 288/1200 ; 96/399 ; synonymous_variant ; plnO ; c.882C>T ; p.Ala294Ala ; 882/1200 ; 882/1200 ; 294/399 ; synonymous_variant ; plnO ; c.990G>A ; p.Glu330Glu ; 990/1200 ; 990/1200 ; 330/399 ;	upstream_gene_variant ; plnO ; c.-3484G>A ; . ; . ; . ; . ; upstream_gene_variant ; plnO ; c.-3462_-3461insG ; . ; . ; . ; . ; upstream_gene_variant ; plnO ; c.-3360G>T ; . ; . ; . ; . ; upstream_gene_variant ; plnO ; c.-3340G>T ; . ; . ; . ; . ; upstream_gene_variant ; plnO ; c.-3334G>A ; . ; . ; . ; . ; upstream_gene_variant ; plnO ; c.-3324C>T ; . ; . ; . ; . ; upstream_gene_variant ; plnO ; c…
	plnP (lp_0412)	Bacteriocin immunity protein PlnP	missense_variant ; plnP ; c.161A>G ; p.Gln54Arg ; 161/747 ; 161/747 ; 54/248 ; synonymous_variant ; plnP ; c.165C>T ; p.Asn55Asn ; 165/747 ; 165/747 ; 55/248 ; missense_variant ; plnP ; c.424G>A ; p.Gly142Ser ; 424/747 ; 424/747 ; 142/248 ; synonymous_variant ; plnP ; c.426T>C ; p.Gly142Gly ; 426/747 ; 426/747 ; 142/248 ;	upstream_gene_variant ; plnP ; c.-3921C>G ; . ; . ; . ; . ; upstream_gene_variant ; plnP ; c.-3920C>T ; . ; . ; . ; . ;
	plnH (lp_0424)	Bacteriocin ABC transporter	synonymous_variant ; plnH ; c.67C>T ; p.Leu23Leu ; 67/1377 ; 67/1377 ; 23/458 ; synonymous_variant ; plnH ; c.123G>T ; p.Ala41Ala ; 123/1377 ; 123/1377 ; 41/458 ; synonymous_variant ; plnH ; c.198C>T ; p.Val66Val ; 198/1377 ; 198/1377 ; 66/458 ; missense_variant ; plnH ; c.251G>A ; p.Gly84Asp ; 251/1377 ; 251/1377 ; 84/458 ; synonymous_variant ; plnH ; c.252T>C ; p.Gly84Gly ; 252/1377 ; 252/1377 …	upstream_gene_variant ; plnH ; c.-4775A>G ; . ; . ; . ; . ; upstream_gene_variant ; plnH ; c.-4757G>A ; . ; . ; . ; . ; upstream_gene_variant ; plnH ; c.-4725A>G ; . ; . ; . ; . ;
	plnU (lp_0426)	Integral membrane protein PlnU, membrane-bound protease CAAX family	missense_variant ; plnU ; c.16A>C ; p.Ile6Leu ; 16/669 ; 16/669 ; 6/222 ; missense_variant ; plnU ; c.115C>T ; p.Pro39Ser ; 115/669 ; 115/669 ; 39/222 ; missense_variant ; plnU ; c.130A>G ; p.Ile44Val ; 130/669 ; 130/669 ; 44/222 ; missense_variant ; plnU ; c.131T>G ; p.Ile44Ser ; 131/669 ; 131/669 ; 44/222 ; missense_variant ; plnU ; c.226T>G ; p.Leu76Val ; 226/669 ; 226/669 ; 76/222 ; synonymou…	missense_variant ; plnU ; c.646C>A ; p.Leu216Ile ; 646/669 ; 646/669 ; 216/222 ;
	plnV (lp_0433)	Integral membrane protein plnV membrane-boundprotease CAAX family	missense_variant ; plnV ; c.28A>G ; p.Ser10Gly ; 28/681 ; 28/681 ; 10/226 ; missense_variant ; plnV ; c.223G>A ; p.Ala75Thr ; 223/681 ; 223/681 ; 75/226 ; synonymous_variant ; plnV ; c.246A>G ; p.Gln82Gln ; 246/681 ; 246/681 ; 82/226 ; missense_variant ; plnV ; c.253A>G ; p.Ile85Val ; 253/681 ; 253/681 ; 85/226 ; synonymous_variant ; plnV ; c.285T>C ; p.Ile95Ile ; 285/681 ; 285/681 ; 95/226 ; syn…	missense_variant ; plnV ; c.28A>G ; p.Ser10Gly ; 28/681 ; 28/681 ; 10/226 ; synonymous_variant ; plnV ; c.97T>C ; p.Leu33Leu ; 97/681 ; 97/681 ; 33/226 ; missense_variant ; plnV ; c.223G>A ; p.Ala75Thr ; 223/681 ; 223/681 ; 75/226 ; synonymous_variant ; plnV ; c.246A>G ; p.Gln82Gln ; 246/681 ; 246/681 ; 82/226 ; missense_variant ; plnV ; c.253A>G ; p.Ile85Val ; 253/681 ; 253/681 ; 85/226 ; synony…
	plnW (lp_0429)	plantaricin W alpha and beta	synonymous_variant ; plnW ; c.198A>G ; p.Leu66Leu ; 198/687 ; 198/687 ; 66/228 ; missense_variant ; plnW ; c.226G>A ; p.Ala76Thr ; 226/687 ; 226/687 ; 76/228 ; synonymous_variant ; plnW ; c.243A>G ; p.Arg81Arg ; 243/687 ; 243/687 ; 81/228 ; missense_variant ; plnW ; c.286C>T ; p.Leu96Phe ; 286/687 ; 286/687 ; 96/228 ; missense_variant ; plnW ; c.298T>C ; p.Tyr100His ; 298/687 ; 298/687 ; 100/228 …	missense_variant ; plnW ; c.41T>C ; p.Ile14Thr ; 41/687 ; 41/687 ; 14/228 ; missense_variant ; plnW ; c.316G>A ; p.Val106Ile ; 316/687 ; 316/687 ; 106/228 ; missense_variant ; plnW ; c.479A>G ; p.Asp160Gly ; 479/687 ; 479/687 ; 160/228 ; synonymous_variant ; plnW ; c.495A>G ; p.Ala165Ala ; 495/687 ; 495/687 ; 165/228 ; missense_variant ; plnW ; c.557T>C ; p.Leu186Pro ; 557/687 ; 557/687 ; 186/228…
	The results of functional annotation by transcripts. Type of variant (syn/nonsyn), protein change, and etc. can be ascertained. A representative transcript is chosen by the gene name obtained from variant calling analysis. Other transcripts are chosen by information of neighboring genes which are close enough. - It is not uncommon for a gene to have more than one transcript. A variant might affec…
