# Supplementary material for: Decoding the Gene Variants of Two Native Probiotic Lactiplantibacillus plantarum Strains through Whole-Genome Resequencing: Insights into Bacterial Adaptability to Stressors and Antimicrobial Strength
Source: Genes (Basel). 2022 Feb 28;13(3):443. doi: 10.3390/genes13030443 (PMC8953754; doi:10.3390/genes13030443)
Supplement: Supplementary file 1 [file genes-13-00443-s001.zip › Table S4.xlsx]

## Sheet: Sheet1
	Table S4. Variant annotation results of genes related with strain adaptation to different stressors
Stress	Gene annotation (locus tag in WCFS1)	Gene product	Library name
			Representtive Transcript (annotation_type ; Gene_name ; codon_change ; protein_change ; cDNA_position/cDNA_lenght ; CDS_position/CDS_lenght ; Protein_position/Protein_lenght)
			UTNGt21A	UTNGt2
pH	atpC ( lp_2363)	ATP synthase epsilon chain	none	upstream_gene_variant ; atpC ; c.-1503G>A ; . ; . ; . ; . ;
	atpD ( lp_2364)	ATP synthase subunit beta	upstream_gene_variant ; atpD ; c.-4755C>G ; . ; . ; . ; . ; upstream_gene_variant ; atpD ; c.-4777G>A ; . ; . ; . ; . ;	synonymous_variant ; atpD ; c.471T>C ; p.Val157Val ; 471/1404 ; 471/1404 ; 157/467 ; . ; . ; . ; . ;
	atpG ( lp_2365)	ATP synthase gamma chain	none	synonymous_variant ; atpG ; c.882G>A ; p.Ala294Ala ; 882/945 ; 882/945 ; 294/314 ; synonymous_variant ; atpG ; c.285G>A ; p.Val95Val ; 285/945 ; 285/945 ; 95/314 ;
	atpA ( lp_2366)	ATP synthase subunit alpha	conservative_inframe_insertion ; atpA ; c.1501_1502insCCGCTG ; p.Thr501_Ala502insAlaAla ; 1501/1515 ; 1501/1515 ; 501/504 ; ; . ; . ; . ; . ; upstream_gene_variant ; atpA ; c.-4634_-4633insG ; . ; . ; . ; . ; upstream_gene_variant ; atpA ; c.-4723T>C ; . ; . ; . ; . ;	conservative_inframe_insertion ; atpA ; c.1501_1502insCCGCTG ; p.Thr501_Ala502insAlaAla ; 1501/1515 ; 1501/1515 ; 501/504 ; ; . ; . ; . ; synonymous_variant ; atpA ; c.666A>C ; p.Ile222Ile ; 666/1515 ; 666/1515 ; 222/504 ; ; . ; . ; . ; . ;
	atpH ( lp_2367)	ATP synthase subunit delta	none	synonymous_variant ; atpH ; c.402C>T ; p.Arg134Arg ; 402/546 ; 402/546 ; 134/181 ;
	atpF ( lp_2368)	ATP synthase subunit b	none	synonymous_variant ; atpF ; c.180T>A ; p.Ser60Ser ; 180/516 ; 180/516 ; 60/171 ;
	atpE ( lp_2369)	ATP synthase subunit c	none	none
	atpB ( lp_2370)	ATP synthase subunit a	none	none
	lepA_1 (lp_2015)	elongation factor 4	synonymous_variant ; lepA1 ; c.1812T>C ; p.Thr604Thr ; 1812/1836 ; 1812/1836 ; 604/611 ; synonymous_variant ; lepA1 ; c.1800G>T ; p.Ala600Ala ; 1800/1836 ; 1800/1836 ; 600/611 ; synonymous_variant ; lepA1 ; c.1518T>C ; p.Ser506Ser ; 1518/1836 ; 1518/1836 ; 506/611 ;	synonymous_variant ; lepA1 ; c.1812T>C ; p.Thr604Thr ; 1812/1836 ; 1812/1836 ; 604/611 ; synonymous_variant ; lepA1 ; c.1800G>T ; p.Ala600Ala ; 1800/1836 ; 1800/1836 ; 600/611 ; synonymous_variant ; lepA1 ; c.1518T>C ; p.Ser506Ser ; 1518/1836 ; 1518/1836 ; 506/611 ; synonymous_variant ; lepA1 ; c.1467C>T ; p.Asp489Asp ; 1467/1836 ; 1467/1836 ; 489/611 ; synonymous_variant ; lepA1 ; c.1326G>A ; p.…
	lepA_2 (lp_3120)	elongation factor 4	none	synonymous_variant ; lepA2 ; c.51C>T ; p.His17His ; 51/1788 ; 51/1788 ; 17/595 ; missense_variant ; lepA2 ; c.82T>G ; p.Ser28Ala ; 82/1788 ; 82/1788 ; 28/595 ; synonymous_variant ; lepA2 ; c.114G>A ; p.Gln38Gln ; 114/1788 ; 114/1788 ; 38/595 ; synonymous_variant ; lepA2 ; c.159C>T ; p.Gly53Gly ; 159/1788 ; 159/1788 ; 53/595 ; synonymous_variant ; lepA2 ; c.177T>C ; p.Arg59Arg ; 177/1788 ; 177/178…
bile salt	yxeI_1 (lp_3362)	putative protein YxeI (Choloylglycine hydrolase)	none	none																													bile salt	yxeI_1 (lp_3362)	bile salt	yxeI_1 (lp_3362)	The results of functional annotation by transcripts. Type of variant (syn/nonsyn), protein change, and etc. can be ascertained. A representative transcript is chosen by the gene name obtained from variant calling analysis. Other transcripts are chosen by information of neighboring genes which are close enough. - It is not uncommon for a gene to have more than one transcript. A variant might affec…
	yxeI_2	putative protein YxeI (Choloylglycine hydrolase)	none	none																														yxeI_2		yxeI_2
	yxeI_3	putative protein YxeI (Choloylglycine hydrolase)	none	none																														yxeI_3		yxeI_3
	cbh (lp_3536)	Conjugated bile acid hydrolase	none	none																														cbh (lp_3536)		cbh (lp_3536)
temperature	hsp2 (lp_2668)	18 kDa heat shock protein	synonymous_variant ; hsp2 ; c.408C>A ; p.Ile136Ile ; 408/420 ; 408/420 ; 136/139 ; synonymous_variant ; hsp2 ; c.279A>G ; p.Arg93Arg ; 279/420 ; 279/420 ; 93/139 ; synonymous_variant ; hsp2 ; c.246C>T ; p.Arg82Arg ; 246/420 ; 246/420 ; 82/139 ;	synonymous_variant ; hsp2 ; c.408C>A ; p.Ile136Ile ; 408/420 ; 408/420 ; 136/139 ; synonymous_variant ; hsp2 ; c.279A>G ; p.Arg93Arg ; 279/420 ; 279/420 ; 93/139 ; missense_variant ; hsp2 ; c.239A>G ; p.Asp80Gly ; 239/420 ; 239/420 ; 80/139 ;																													temperature	hsp2 (lp_2668)	temperature	hsp2 (lp_2668)
	hrcA (lp_2029)	Heat-inducible transcription repressor HrcA	none	none																														hrcA (lp_2029)		hrcA (lp_2029)
	grpE (lp_2028)	Protein GrpE	none	synonymous_variant ; grpE ; c.534C>T ; p.Val178Val ; 534/600 ; 534/600 ; 178/199 ;																														grpE (lp_2028)		grpE (lp_2028)
	dnaK ( lp_2027)	Chaperone protein DnaK	none	missense_variant ; dnaK ; c.1792A>G ; p.Asn598Asp ; 1792/1869 ; 1792/1869 ; 598/622 ; synonymous_variant ; dnaK ; c.1437T>C ; p.Gly479Gly ; 1437/1869 ; 1437/1869 ; 479/622 ; synonymous_variant ; dnaK ; c.1140C>A ; p.Val380Val ; 1140/1869 ; 1140/1869 ; 380/622 ; synonymous_variant ; dnaK ; c.180C>T ; p.Ile60Ile ; 180/1869 ; 180/1869 ; 60/622 ;																														dnaK ( lp_2027)		dnaK ( lp_2027)
	dnaJ ( lp_2026)	Chaperone protein DnaJ	synonymous_variant ; dnaJ ; c.966C>T ; p.Gly322Gly ; 966/1143 ; 966/1143 ; 322/380 ; synonymous_variant ; dnaJ ; c.474T>C ; p.Gly158Gly ; 474/1143 ; 474/1143 ; 158/380 ; synonymous_variant ; dnaJ ; c.222G>A ; p.Gln74Gln ; 222/1143 ; 222/1143 ; 74/380 ;	synonymous_variant ; dnaJ ; c.1131T>C ; p.Leu377Leu ; 1131/1143 ; 1131/1143 ; 377/380 ; synonymous_variant ; dnaJ ; c.966C>T ; p.Gly322Gly ; 966/1143 ; 966/1143 ; 322/380 ; synonymous_variant ; dnaJ ; c.222G>A ; p.Gln74Gln ; 222/1143 ; 222/1143 ; 74/380 ;																														dnaJ ( lp_2026)		dnaJ ( lp_2026)
	Gt21A_01250	18 kDa heat shock protein	none	none																														Gt21A_01250		Gt21A_01250
	hslR	Heat shock protein 15	none	none																														hslR		hslR
	groL (lp_0728)	60 kDa chaperonin	synonymous_variant ; groEL ; c.615T>C ; p.Asp205Asp ; 615/1626 ; 615/1626 ; 205/541 ; synonymous_variant ; groEL ; c.1371A>G ; p.Leu457Leu ; 1371/1626 ; 1371/1626 ; 457/541 ;	synonymous_variant ; groEL ; c.1137C>T ; p.Val379Val ; 1137/1626 ; 1137/1626 ; 379/541 ; synonymous_variant ; groEL ; c.1371A>G ; p.Leu457Leu ; 1371/1626 ; 1371/1626 ; 457/541 ;																														groL (lp_0728)		groL (lp_0728)
	groS (lp_0727)	10 kDa chaperonin	none	synonymous_variant ; groES ; c.267C>T ; p.Ile89Ile ; 267/285 ; 267/285 ; 89/94 ;																														groS (lp_0727)		groS (lp_0727)
	hslO (lp_0548)	33 kDa chaperonin	none	none																														hslO (lp_0548)		hslO (lp_0548)
	hsp 1 (lp_0129)	hypotetical small heat shock protein	synonymous_variant ; hsp1 ; c.66C>T ; p.Arg22Arg ; 66/423 ; 66/423 ; 22/140 ;	missense_variant ; hsp1 ; c.94G>A ; p.Asp32Asn ; 94/423 ; 94/423 ; 32/140 ; missense_variant ; hsp1 ; c.194G>A ; p.Arg65His ; 194/423 ; 194/423 ; 65/140 ; missense_variant ; hsp1 ; c.328A>G ; p.Asn110Asp ; 328/423 ; 328/423 ; 110/140 ;																														hsp 1 (lp_0129)		hsp 1 (lp_0129)
	ccpA_1	Catabolite control protein A	synonymous_variant ; ccpA ; c.861A>C ; p.Ala287Ala ; 861/1011 ; 861/1011 ; 287/336 ;	synonymous_variant ; ccpA ; c.861A>C ; p.Ala287Ala ; 861/1011 ; 861/1011 ; 287/336 ;																														ccpA_1		ccpA_1
	ccpA_2	Catabolite control protein A	synonymous_variant ; ccpA ; c.567A>G ; p.Ser189Ser ; 567/1011 ; 567/1011 ; 189/336 ;	synonymous_variant ; ccpA ; c.468A>G ; p.Glu156Glu ; 468/1011 ; 468/1011 ; 156/336 ;																														ccpA_2		ccpA_2
	ccpA_3	Catabolite control protein A	synonymous_variant ; ccpA ; c.93T>C ; p.Asn31Asn ; 93/1011 ; 93/1011 ; 31/336 ;	synonymous_variant ; ccpA ; c.132C>T ; p.Ile44Ile ; 132/1011 ; 132/1011 ; 44/336 ;																														ccpA_3		ccpA_3
	ccpA_4	Catabolite control protein A	none	synonymous_variant ; ccpA ; c.93T>C ; p.Asn31Asn ; 93/1011 ; 93/1011 ; 31/336 ;																														ccpA_4		ccpA_4
	ccpB	Catabolite control protein B	synonymous_variant ; ccpB ; c.780A>G ; p.Pro260Pro ; 780/939 ; 780/939 ; 260/312 ;	synonymous_variant ; ccpB ; c.780A>G ; p.Pro260Pro ; 780/939 ; 780/939 ; 260/312 ; missense_variant ; ccpB ; c.475C>A ; p.Arg159Ser ; 475/939 ; 475/939 ; 159/312 ;																														ccpB		ccpB
	csp P (lp_1160)	cold shock protein 1	synonymous_variant ; cspP ; c.144T>C ; p.Thr48Thr ; 144/201 ; 144/201 ; 48/66 ;	synonymous_variant ; cspP ; c.144T>C ; p.Thr48Thr ; 144/201 ; 144/201 ; 48/66 ;																														csp (lp_1160)		csp (lp_1160)
	cspL (lp_0031)	cold shock protein 2	none	none																														cspL (lp_0031)		cspL (lp_0031)
	cspLA	Cold shock-like protein CspLA	none	none																														cspLA		cspLA
osmosis	opuCD (lp_1610)	Carnitine transport permease protein OpuCD	synonymous_variant ; opuD ; c.354A>G ; p.Leu118Leu ; 354/654 ; 354/654 ; 118/217 ; synonymous_variant ; opuD ; c.585T>C ; p.Ala195Ala ; 585/654 ; 585/654 ; 195/217 ;	synonymous_variant ; opuD ; c.165A>G ; p.Arg55Arg ; 165/654 ; 165/654 ; 55/217 ; synonymous_variant ; opuD ; c.354A>G ; p.Leu118Leu ; 354/654 ; 354/654 ; 118/217 ;																													osmosis	opuCD (lp_1610)	osmosis	opuCD (lp_1610)
	opuCC (lp_1609)	Glycine betaine/carnitine/choline-binding protein OpuCC	synonymous_variant ; opuC ; c.48C>T ; p.Ala16Ala ; 48/936 ; 48/936 ; 16/311 ; synonymous_variant ; opuC ; c.210C>T ; p.Asn70Asn ; 210/936 ; 210/936 ; 70/311 ; synonymous_variant ; opuC ; c.243T>C ; p.Ala81Ala ; 243/936 ; 243/936 ; 81/311 ; synonymous_variant ; opuC ; c.549C>T ; p.Gly183Gly ; 549/936 ; 549/936 ; 183/311 ; synonymous_variant ; opuC ; c.672T>C ; p.Asp224Asp ; 672/936 ; 672/936 ; 224…	synonymous_variant ; opuC ; c.312C>T ; p.Gly104Gly ; 312/936 ; 312/936 ; 104/311 ; synonymous_variant ; opuC ; c.459T>C ; p.Tyr153Tyr ; 459/936 ; 459/936 ; 153/311 ;																														opuCC (lp_1609)		opuCC (lp_1609)
	opuCB_1 (lp_1608)	Carnitine transport permease protein OpuCB	synonymous_variant ; opuB ; c.69G>A ; p.Ser23Ser ; 69/630 ; 69/630 ; 23/209 ; synonymous_variant ; opuB ; c.174G>A ; p.Leu58Leu ; 174/630 ; 174/630 ; 58/209 ; synonymous_variant ; opuB ; c.537C>T ; p.Gly179Gly ; 537/630 ; 537/630 ; 179/209 ; synonymous_variant ; opuB ; c.549A>G ; p.Pro183Pro ; 549/630 ; 549/630 ; 183/209 ; synonymous_variant ; opuB ; c.594A>G ; p.Leu198Leu ; 594/630 ; 594/630 ; 1…	synonymous_variant ; opuB ; c.174G>A ; p.Leu58Leu ; 174/630 ; 174/630 ; 58/209 ; synonymous_variant ; opuB ; c.240A>T ; p.Pro80Pro ; 240/630 ; 240/630 ; 80/209 ; splice_region_variant&stop_retained_variant ; opuB ; c.630G>A ; p.Ter210Ter ; 630/630 ; 630/630 ; 210/209 ;																														opuCB_1 (lp_1608)		opuCB_1 (lp_1608)
	opuCA (lp_1607)	Carnitine transport ATP-binding protein OpuCA	synonymous_variant ; opuA ; c.255T>C ; p.Asn85Asn ; 255/1197 ; 255/1197 ; 85/398 ; synonymous_variant ; opuA ; c.567G>A ; p.Thr189Thr ; 567/1197 ; 567/1197 ; 189/398 ; synonymous_variant ; opuA ; c.939C>T ; p.Gly313Gly ; 939/1197 ; 939/1197 ; 313/398 ;	synonymous_variant ; opuA ; c.363G>A ; p.Lys121Lys ; 363/1197 ; 363/1197 ; 121/398 ; synonymous_variant ; opuA ; c.499T>C ; p.Leu167Leu ; 499/1197 ; 499/1197 ; 167/398 ; synonymous_variant ; opuA ; c.879G>A ; p.Leu293Leu ; 879/1197 ; 879/1197 ; 293/398 ;																														opuCA (lp_1607)		opuCA (lp_1607)
	opuCB_2	Carnitine transport permease protein OpuCB	none	none																														opuCB_2		opuCB_2
	choS (lp_0367)	Glycine betaine/carnitine/choline-binding protein	synonymous_variant ; choS ; c.72G>A ; p.Gly24Gly ; 72/1527 ; 72/1527 ; 24/508 ; synonymous_variant ; choS ; c.531T>C ; p.Thr177Thr ; 531/1527 ; 531/1527 ; 177/508 ; synonymous_variant ; choS ; c.933A>G ; p.Thr311Thr ; 933/1527 ; 933/1527 ; 311/508 ; synonymous_variant ; choS ; c.969C>T ; p.Leu323Leu ; 969/1527 ; 969/1527 ; 323/508 ; synonymous_variant ; choS ; c.1212T>C ; p.Arg404Arg ; 1212/1527 …	missense_variant ; choS ; c.85T>G ; p.Ser29Ala ; 85/1527 ; 85/1527 ; 29/508 ; synonymous_variant ; choS ; c.181C>T ; p.Leu61Leu ; 181/1527 ; 181/1527 ; 61/508 ; synonymous_variant ; choS ; c.303C>T ; p.Tyr101Tyr ; 303/1527 ; 303/1527 ; 101/508 ; synonymous_variant ; choS ; c.321C>T ; p.Ile107Ile ; 321/1527 ; 321/1527 ; 107/508 ; synonymous_variant ; choS ; c.324T>C ; p.Asp108Asp ; 324/1527 ; 324/…																														choS (lp_0367)		choS (lp_0367)
	choQ (lp_0368)	Glycine betaine/carnitine/choline-binding protein		none																														choQ (lp_0368)		choQ (lp_0368)
The results of functional annotation by transcripts. Type of variant (syn/nonsyn), protein change, and etc. can be ascertained. A representative transcript is chosen by the gene name obtained from variant calling analysis. Other transcripts are chosen by information of neighboring genes which are close enough.
